# Supplementary material for: DNA Damage Repair Classifier Defines Distinct Groups in Hepatocellular Carcinoma
Source: MDPI journal article supplement (doi:10.3390/cancers14174282), 2022-09-01
Supplement: s1 [file s1]

**Supplemental Table S1. DNA repair genes by pathway**

| Pathway                             | Error Propensity | Genes                                                                                                                                                                                                                                                                                                                          |
|-------------------------------------|------------------|--------------------------------------------------------------------------------------------------------------------------------------------------------------------------------------------------------------------------------------------------------------------------------------------------------------------------------|
| Mismatch Repair                     | Low              | EXO1, MLH1, MLH3, MSH2, MSH3, MSH6, PMS2                                                                                                                                                                                                                                                                                       |
| Nucleotide Excision Repair          | Low              | ERCC1, ERCC2, ERCC3, ERCC4, ERCC5, ERCC6, LIG1, LIG3, RAD23B, XPA, XPC, XRCC1                                                                                                                                                                                                                                                  |
| Trans-Lesion Synthesis              | Low              | MAD2L2, POLH, POLI, POLK, RAD18, REV1, UBE2A, UBE2B, USP7                                                                                                                                                                                                                                                                      |
| Fanconi Anemia                      | Low              | BTBD12, C17orf70, C1orf86, FANCA, FANCB, FANCC, FANCD2, FANCE, FANCG, FANCI, FANCL, FANCM, MTMR15, PALB2, UBE2T, USP1                                                                                                                                                                                                          |
| Base Excision Repair                | Low              | APEX1, FEN1, NEIL1, NEIL2, NEIL3, OGG1, PCNA, PNKP                                                                                                                                                                                                                                                                             |
| Nucleotide metabolism               | Low              | RNASEH1, RNASEH2B, RRM1, RRM2, RRM2B, TK1                                                                                                                                                                                                                                                                                      |
| Template Switch                     | Low              | SHPRH, ZRANB3                                                                                                                                                                                                                                                                                                                  |
| Poly ADP Ribose Polymerases         | Low              | C12orf48, PARP1, PARP2, PARP3, PARP4, PARP9                                                                                                                                                                                                                                                                                    |
| Checkpoint                          | High             | ATM, ATR, CHEK1, CHEK2, CLSPN, HUS1, HUS1B, MDC1, RAD1, RAD9A, RAD9B, RAD17, TIMELESS, TIPIN                                                                                                                                                                                                                                   |
| DNA replication factors/Cell Cycle  | High             | AURKA, AURKB, CCNA1, CCNA2, CCNB1, CCND1, CCND2, CCND3, CCNE1, CDC25A, CDC25B, CDC25C, CDC45, CDC6, CDKN1A, CDKN1B, CDKN2A, CDT1, DDB1, DDB2, E2F1, E2F2, E2F3, E2F4, E2F5, E2F6, E2F7, GMNN, MAX, MCM10, MCM7, MYC, PHB, PLK1, POLD3, POLD4, POLE4, PPP1R12A, RB1, RBL1, RBL2, RFC2, RFC3, RFC4, RFC5, RPA1, RPA2, RPA3, WEE1 |
| Homologous Recombination            | High             | BARD1, BLM, BRCA1, BRCA2, BRIP1, DNA2, FAM175A, FBXO5, MUS81, RAD51, RAD51AP1, RAD51C, RAD51L1, RAD51L3, RAD54B, RAD54L, RAD54L2, RBBP8, RNF138, TOP3A, TOP3B, TOPBP1, UIMC1, XRCC2                                                                                                                                            |
| Nonhomologous End Joining           | High             | DCLRE1C, DNTT, LIG4, MRE11A, NBN, NHEJ1, POLB, POLL, POLM, POLQ, RAD50, RIF1, RNF168, RNF169, RNF8, TP53BP1, XRCC4, XRCC5, XRCC6                                                                                                                                                                                               |
| Mitosis/Spindle Assembly Checkpoint | High             | BUB1, BUB1B, BUB3, CDC20, CDH1, ESPL1, MAD1L1, MAD2L1, PTTG1, TRIM69                                                                                                                                                                                                                                                           |
| Repair/Replication DNA Polymerases  | High             | POLD1, POLE                                                                                                                                                                                                                                                                                                                    |
| APOBEC                              |                  | APOBEC1, APOBEC3A, APOBEC3B, APOBEC3C, APOBEC3D, APOBEC3F, APOBEC3G, APOBEC3H                                                                                                                                                                                                                                                  |
| Cancer Testes Antigens              |                  | HORMAD1, MAGEA1, MAGEA4, MAGEA6, MAGEA10                                                                                                                                                                                                                                                                                       |

Supplemental Table S2. p53 and HRD-related features in HCC stratified by DNA repair groups.

| n                    |               | 1 - Low<br>216 | 2 - High<br>158 | p-value |
|----------------------|---------------|----------------|-----------------|---------|
| p53 status           |               |                |                 |         |
|                      | p53 mutant    | 45 (24.6)      | 138 (75.4)      | <0.001  |
|                      | WT            | 171 (89.5)     | 20 (10.5)       |         |
| TP53 mutation status |               |                |                 |         |
|                      | TP53 mutation | 41 (36.6)      | 71 (63.4)       | <0.001  |
|                      | WT            | 175 (66.8)     | 87 (33.2)       |         |
| HRD status           |               |                |                 |         |
|                      | HRD High      | 48 (36.1)      | 85 (63.9)       | <0.001  |
|                      | HRD Low       | 153 (71.5)     | 61 (28.5)       |         |
| HBV status           |               |                |                 |         |
|                      | Negative      | 146 (67.3)     | 71 (32.7)       | <0.001  |
|                      | Positive      | 66 (43.7)      | 85 (56.3)       |         |

Supplemental Table S3. p53 and HRD-related features in HCC stratified by Low-repair subgroups.

|                      |            | L1        | L2        | L3        | p-value |
|----------------------|------------|-----------|-----------|-----------|---------|
| n                    |            | 86        | 56        | 74        |         |
| p53 status           |            |           |           |           |         |
|                      | p53 mutant | 0 (0.0)   | 26 (57.8) | 19 (42.2) | <0.001  |
|                      | WT         | 86 (50.3) | 30 (17.5) | 55 (32.2) |         |
| TP53 mutation status |            |           |           |           |         |
|                      | TP53 mut   | 4 (9.7)   | 12 (29.3) | 25 (61.0) | <0.001  |
|                      | WT         | 82 (46.9) | 44 (25.1) | 49 (28.0) |         |
| HRD status           |            |           |           |           |         |
|                      | HRD High   | 8 (16.7)  | 18 (37.5) | 22 (45.8) | 0.002   |
|                      | HRD Low    | 69 (45.1) | 35 (22.9) | 49 (32.0) |         |

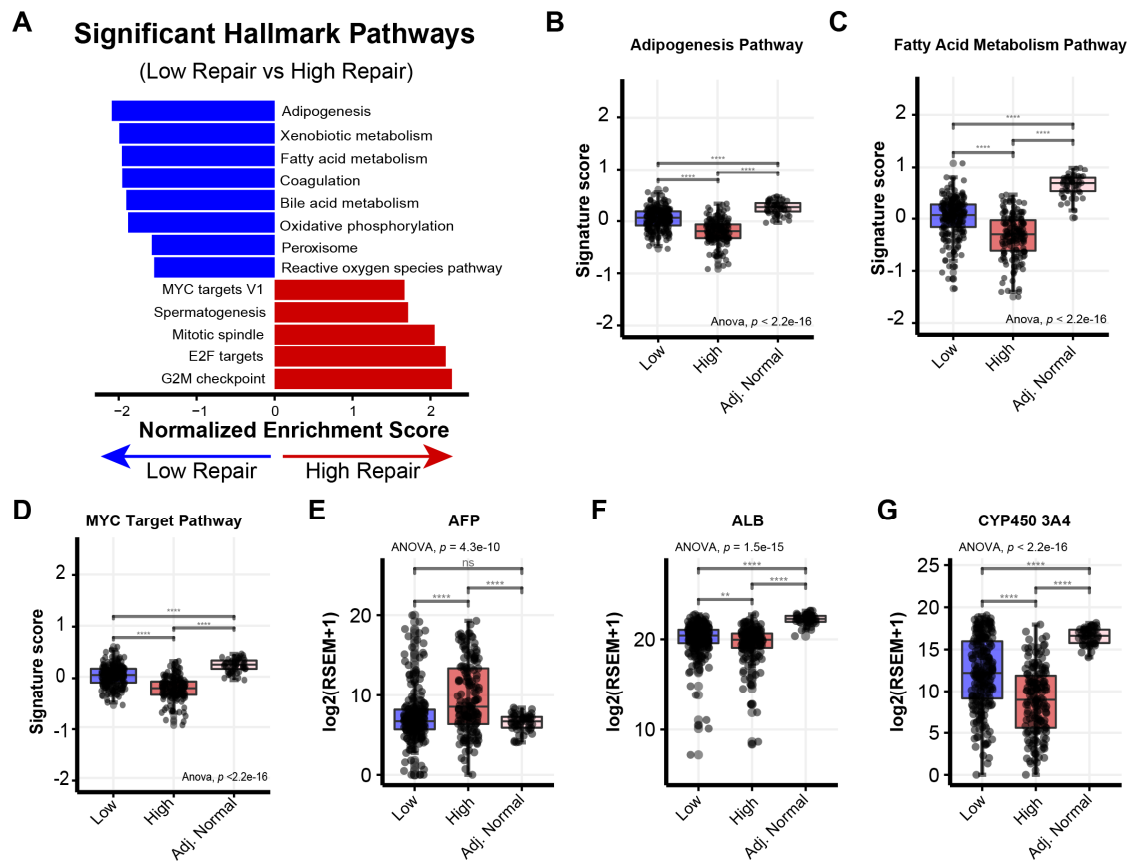

**Supplemental Figure S1.** Low-repair samples display expression of genes involved in liver function. (A) Gene Set Enrichment Analysis was performed Low-repair (blue) vs High-repair (red) using the Hallmark gene sets. Significant pathways were plotted by normalized enrichment score (NES). One-way ANOVA  $p$ -value is displayed. (B) Adipogenesis, (C) Fatty acid metabolism, and (D) MYC target pathway scores are plotted by Repair groups and Tumor adjacent normal. (E–G) Gene expression for hepatoblast marker *AFP*, hepatocyte markers *ALB*, and liver metabolomic marker *CYP450* are shown by Repair group. For pairwise comparisons between groups, ns indicates not significant, \*\* indicates  $p < 0.01$  and \*\*\*\* indicates  $p < 0.0001$  for all pairwise t-test. included for each measure.

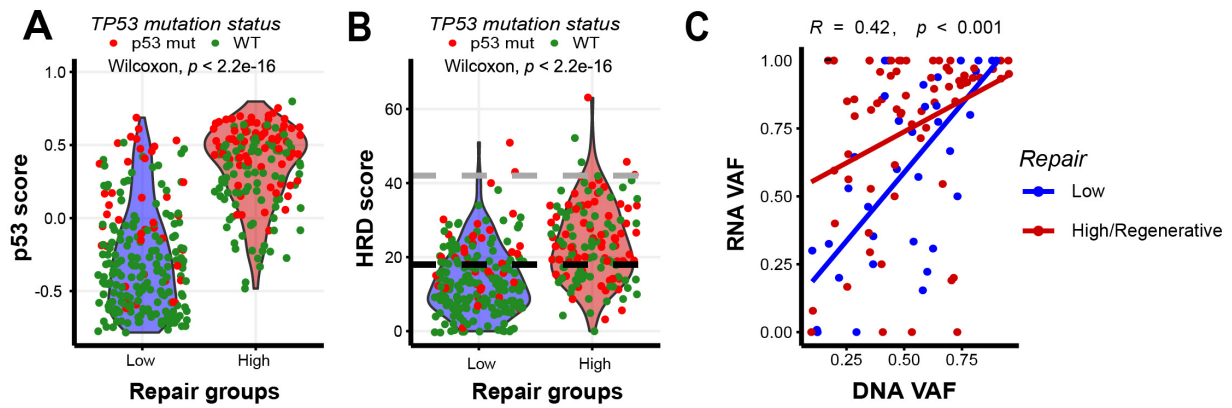

**Supplemental Figure S2. *TP53* dysfunction and high HRD are defining features of High repair tumors.**

(A) Violin plot of p53 score by Repair groups. Points are colored by *TP53* mutation status, Low repair (blue) and High repair (red);  $p < 2.2e-16$  for Wilcoxon test between repair groups. (B) Violin plot of HRD score by Repair groups. Points are colored by *TP53* mutation status, Low (blue) and High (red);  $p < 2.2e-16$  for Wilcoxon test between repair groups. (C) Variant allele frequencies for *TP53* were calculated from the RNA and DNA sequencing reads. Repair groups are indicated by point color (blue = Low and red = High/Regenerative). Regression lines are plotted and colored according to Repair group.
