# Supplementary material for: DNA Damage Repair Classifier Defines Distinct Groups in Hepatocellular Carcinoma
Source: Cancers (Basel). 2022 Sep 1;14(17):4282. doi: 10.3390/cancers14174282 (PMC9454479; doi:10.3390/cancers14174282)
Supplement: Supplementary file 1 [file cancers-14-04282-s001.zip › cancers-1878543-SupplementalData.xlsx]

## Sheet: Sheet1
RNA_ID	dna_repairgroups	dna_repair_score	histological_type	molecular_subtype	sex	age	race	cirrhosis_fibrosis	stage	grade	vascular_invasionbinary	ajcc7_tumor_pathologic_pt	HBVstatus	HBV.Log	PFS_event_5yr	PFS_time_5yr	OS_event_5yr	OS_time_5yr	mitosis_score	regeneration_score	HRD_Score	HRDstatus	TP53_mutation_status_DNA	p53score_rna	p53_status_rna	dna_groups_lowclusters	dna_group_lowgroups_survival	adipogeneis_pathwayscore	fatty_acid_metabolism_pathwayscore	myc_pathwayscore
TCGA-2V-A95S-01A-11R-A37K-07	Grp2	0.274227	Hepatocellular Carcinoma	Blast_Like	MALE		ASIAN	Cirrhosis/Fibrosis	Stage II	G3/G4	None	T2	HBV.neg	0	0		0		0.757554	0.218673	14	HRD Low	WT	0.30165	p53 mutant	2	2	-0.300201	-0.654654	0.311368
TCGA-2Y-A9GS-01A-12R-A38B-07	Grp2	0.542924	Hepatocellular Carcinoma	HCC	MALE	58	WHITE			G1/G2	Macro/Micro	T2	HBV.neg	0	1	0.279452	1	1.98356	1.23382	0.0109303	9	HRD Low	p53 mut	0.525416	p53 mutant	2	2	-0.194951	0.114242	0.310528
TCGA-2Y-A9GT-01A-11R-A38B-07	Grp1	-0.171988	Hepatocellular Carcinoma	HCC	MALE	51	WHITE		Stage I	G1/G2	None	T1	HBV.neg	0	1	2.96712	1	4.44932	-1.16533	-0.246423	2	HRD Low	WT	-0.603824	WT	L3	L3	-0.00992952	0.198272	-0.386443
TCGA-2Y-A9GU-01A-11R-A38B-07	Grp1	-0.192816	Hepatocellular Carcinoma	HCC	FEMALE	55	WHITE		Stage I	G1/G2	None	T1	HBV.neg	0	0	5	0	5	0.374622	-0.848549	17	HRD Low	WT	0.0149056	p53 mutant	L3	L3	0.409647	0.376192	-0.146211
TCGA-2Y-A9GV-01A-11R-A38B-07	Grp1	-0.132436	Hepatocellular Carcinoma	HCC	FEMALE	54	WHITE		Stage I	G1/G2	None	T1	HBV.neg	0	0	5	0	5	-2.39578	-0.00522477	19	HRD Low	WT	-0.679289	WT	L1	L1+L2	0.00010055	0.171845	-0.278438
TCGA-2Y-A9GW-01A-11R-A38B-07	Grp1	-0.246524	Hepatocellular Carcinoma	HCC	MALE	64	WHITE		Stage I	G1/G2	None	T1	HBV.neg	0	1	3.36712	1	3.48219	-0.607328	0.157343	12	HRD Low	WT	-0.449739	WT	L3	L3	-0.0499191	-0.0472504	-0.0735471
TCGA-2Y-A9GX-01A-11R-A38B-07	Grp1	-0.0259485	Hepatocellular Carcinoma	HCC	MALE	68	WHITE		Stage I	G1/G2	None	T1	HBV.neg	0	1	5	0	5	-0.825128	-0.124118	18	HRD Low	WT	-0.720141	WT	L3	L3	-0.166504	0.0029473	-0.212318
TCGA-2Y-A9GY-01A-11R-A38B-07	Grp2	0.439689	Hepatocellular Carcinoma	Blast_Like	FEMALE	64	WHITE		Stage II	G3/G4	None	T2	HBV.neg	0	1	1.74521	1	2.07397	1.07343	0.0739166	24	HRD High	p53 mut	0.630245	p53 mutant	2	2	-0.3238	-0.641281	0.593717
TCGA-2Y-A9GZ-01A-11R-A39D-07	Grp1	0.0907969	Hepatocellular Carcinoma	HCC	FEMALE	82	WHITE		Stage II	G1/G2	None	T2	HBV.neg	0	1	1.96986	1	2.32329	-0.460446	-0.653457	22	HRD High	WT	-0.315451	WT	L3	L3	0.0878837	0.277094	-0.238798
TCGA-2Y-A9H0-01A-11R-A38B-07	Grp2	0.63479	Hepatocellular Carcinoma	HCC	MALE	49	WHITE		Stage III/IV	G1/G2		T3/T4	HBV.neg	0	0	5	0	5	1.25584	-0.158917	16	HRD Low	WT	0.640015	p53 mutant	2	2	-0.142569	-0.233674	0.220409
TCGA-2Y-A9H1-01A-11R-A38B-07	Grp1	-0.628656	Hepatocellular Carcinoma	HCC	MALE	58	WHITE	Cirrhosis/Fibrosis	Stage I	G1/G2	None	T1	HBV.neg	0	1	0.879452	1	3.36712	-2.51388	-0.272774	9	HRD Low	WT	-0.390016	WT	L1	L1+L2	-0.0707711	-0.0015737	0.195958
TCGA-2Y-A9H2-01A-12R-A38B-07	Grp2	0.293482	Hepatocellular Carcinoma	CCA_Like	FEMALE	64	WHITE		Stage I	G3/G4	None	T1	HBV.neg	0	0	4.74247	0	4.74247	0.58414	0.85017	34	HRD High	WT	-0.121757	WT	2	2	-0.394195	-0.969105	0.0358902
TCGA-2Y-A9H3-01A-11R-A38B-07	Grp1	-0.268114	Hepatocellular Carcinoma	HCC	MALE	45	WHITE	Cirrhosis/Fibrosis	Stage II	G1/G2		T2	HBV.neg	0	1	0.060274	0	4.15342	-0.230186	-0.268289	22	HRD High	WT	-0.31476	WT	L2	L1+L2	0.276273	-0.318516	0.0284273
TCGA-2Y-A9H4-01A-11R-A38B-07	Grp2	0.200962	Hepatocellular Carcinoma	HCC	MALE	68	BLACK		Stage I	G1/G2		T1	HBV.pos	15.065	0	3.97808	0	3.97808	0.57261	-0.0243814	19	HRD Low	p53 mut	0.150976	p53 mutant	2	2	-0.174738	-0.00470062	0.186671
TCGA-2Y-A9H5-01A-11R-A38B-07	Grp1	-0.165401	Hepatocellular Carcinoma	CCA_Like	FEMALE	59	WHITE	Cirrhosis/Fibrosis	Stage I	G3/G4	None	T1	HBV.neg	0	1	0.706849	1	1.52055	-0.267239	0.11214	25	HRD High	WT	-0.315597	WT	L3	L3	-0.326162	-0.303216	-0.199175
TCGA-2Y-A9H6-01A-11R-A39D-07	Grp1	-0.20961	Hepatocellular Carcinoma	HCC	FEMALE	68	WHITE		Stage I	G1/G2	None	T1	HBV.neg	0	0	0.978082	0	0.978082	-0.829737	-0.508991	18	HRD Low	WT	-0.575129	WT	L1	L1+L2	0.0175457	-0.0270532	-0.245192
TCGA-2Y-A9H7-01A-11R-A39D-07	Grp2	0.160816	Hepatocellular Carcinoma	HCC	FEMALE	81	WHITE	Cirrhosis/Fibrosis	Stage I	G1/G2	None	T1	HBV.neg	0	1	3.06027	0	3.2	0.0572538	-0.27467	10	HRD Low	WT	-0.0834799	WT	2	2	-0.160246	-0.280954	0.0366034
TCGA-2Y-A9H8-01A-11R-A39D-07	Grp1	0.00549906	Hepatocellular Carcinoma	HCC	FEMALE	85	WHITE			G1/G2	Macro/Micro	T1	HBV.neg	0	1	1.09041	1	1.73425	1.03097	-0.0361909	40	HRD High	p53 mut	0.490288	p53 mutant	L2	L1+L2	-0.147949	0.0455575	0.0131473
TCGA-2Y-A9H9-01A-21R-A39D-07	Grp1	0.0897772	Hepatocellular Carcinoma	HCC	MALE	70	WHITE		Stage I	G1/G2	Macro/Micro	T1	HBV.neg	0	1	0.161644	0	1.90959	-0.341079	0.153749	11	HRD Low	WT	-0.232322	WT	L3	L3	0.214252	0.0659576	-0.111366
TCGA-2Y-A9HA-01A-11R-A39D-07	Grp1	-0.00215028	Hepatocellular Carcinoma	HCC	MALE	70	WHITE	Cirrhosis/Fibrosis	Stage II	G1/G2	Macro/Micro	T2	HBV.neg	0	1	0.0986301	1	0.0986301	0.38159	0.0853929	21	HRD High	p53 mut	0.385775	p53 mutant	L3	L3	-0.0342298	0.0593228	0.0240036
TCGA-2Y-A9HB-01A-11R-A39D-07	Grp1	-0.123899	Hepatocellular Carcinoma	HCC	MALE	66			Stage I	G1/G2	None	T1	HBV.neg	0	0	0.712329	0	0.712329	-0.997718	-0.837978	6	HRD Low	WT	-0.457641	WT	L1	L1+L2	0.289509	0.302596	-0.0730474
TCGA-3K-AAZ8-01A-12R-A39D-07	Grp1	-0.266135	Hepatocellular Carcinoma	HCC	MALE	65	BLACK	Cirrhosis/Fibrosis	Stage III/IV	G1/G2	Macro/Micro	T3/T4	HBV.neg	0	1	0.413699	0	1.08493	-2.37567	-0.788275	7	HRD Low	WT	-0.442276	WT	L1	L1+L2	-0.0391687	0.0630209	0.0396296
TCGA-4R-AA8I-01A-11R-A38B-07	Grp1	0.0838421	Hepatocellular Carcinoma	HCC	MALE	66	WHITE	Cirrhosis/Fibrosis	Stage II	G1/G2		T2	HBV.neg	0	1	0.432877	1	0.717808	0.203127	0.358163	16	HRD Low	p53 mut	0.144281	p53 mutant	L3	L3	0.20636	0.272247	0.00936658
TCGA-5C-A9VG-01A-11R-A37K-07	Grp2	0.292611	Hepatocellular Carcinoma	Blast_Like	MALE	58	WHITE		Stage II	G1/G2	Macro/Micro	T2	HBV.neg	0	0	0.89863	0	0.89863	0.9509	-0.453849	13	HRD Low	WT	0.249474	p53 mutant	2	2	0.0447351	-0.35603	0.567595
TCGA-5C-A9VH-01A-11R-A37K-07	Grp1	-0.12582	Hepatocellular Carcinoma	CCA_Like	MALE	70	WHITE		Stage I	G1/G2	None	T1	HBV.neg	0	0	0.882192	0	0.882192	-0.393411	-0.286783	12	HRD Low	WT	-0.0301193	WT	L3	L3	-0.261319	-0.290745	-0.137935
TCGA-5C-AAPD-01A-21R-A39D-07	Grp2	0.23559	Hepatocholangiocarcinoma (Mixed)	Blast_Like	MALE	61	ASIAN		Stage II	G1/G2	None	T2	HBV.pos	13.2394	0	0.0547945	0	0.0547945	1.54514	0.185826	28	HRD High	p53 mut	0.54351	p53 mutant	2	2	-0.159782	-0.298314	0.524276
TCGA-5R-AA1C-01A-11R-A41C-07	Grp1	-0.0866688	Hepatocellular Carcinoma	HCC	MALE	57	WHITE	Cirrhosis/Fibrosis	Stage II	G1/G2	Macro/Micro	T2	HBV.pos	4.85798	0	1.42466	0	1.42466	-0.658009	-0.77224	7	HRD Low	WT	-0.39694	WT	L1	L1+L2	0.0220725	0.159684	-0.0693684
TCGA-5R-AA1D-01A-11R-A38B-07	Grp1	-0.316468	Hepatocellular Carcinoma	HCC	FEMALE	17	WHITE	No	Stage III/IV	G3/G4	Macro/Micro	T3/T4	HBV.neg	0	0	1.23014	0	1.23014	-2.14829	0.47882	1	HRD Low	WT	-0.676971	WT	L1	L1+L2	0.0830144	-0.0942406	0.0315204
TCGA-5R-AAAM-01A-12R-A41C-07	Grp1	-0.45199	Hepatocellular Carcinoma	HCC	FEMALE	65	WHITE	Cirrhosis/Fibrosis	Stage II	G1/G2	None	T2	HBV.neg	0	0	0.126027	1	0.126027	-1.6457	-0.24975	12	HRD Low	WT	-0.73971	WT	L1	L1+L2	0.22116	0.477379	-0.247522
TCGA-BC-4072-01B-11R-A155-07	Grp2	0.254402	Hepatocellular Carcinoma	CCA_Like	FEMALE	74	WHITE		Stage III/IV	G3/G4	Macro/Micro	T3/T4	HBV.pos	1.58496	1	1.30137	1	4.08219	0.81158	0.227645			WT	0.276777	p53 mutant	2	2	-0.132423	-0.358483	0.062275
TCGA-BC-4073-01B-02R-A131-07	Grp2	0.41714	Hepatocellular Carcinoma	HCC	MALE	73	WHITE		Stage III/IV	G3/G4	None	T3/T4	HBV.neg	0	0	2.32603	0	2.32603	0.933233	0.27777	12	HRD Low	WT	0.126397	p53 mutant	2	2	-0.0819951	-0.2964	0.281442
TCGA-BC-A10Q-01A-11R-A131-07	Grp1	0.085318	Hepatocellular Carcinoma	CCA_Like	FEMALE	72	WHITE						HBV.neg	0	1	0.931507	1	3.10959	0.675349	1.06618	15	HRD Low	WT	-0.148443	WT	L3	L3	-0.351745	-1.15262	-0.217606
TCGA-BC-A10R-01A-11R-A131-07	Grp1	-0.471497	Hepatocellular Carcinoma	HCC	FEMALE	66	WHITE			G1/G2	None		HBV.neg	0	1	0.545205	1	0.843836	-1.27909	-0.52994	26	HRD High	p53 mut	-0.593069	WT	L3	L3	0.261749	0.202714	-0.100845
TCGA-BC-A10S-01A-22R-A131-07	Grp1	-0.499806	Hepatocellular Carcinoma	HCC	MALE	81	WHITE			G1/G2	Macro/Micro		HBV.neg	0	1	3.09589	1	3.89863	-2.31351	-0.657149			WT	-0.63411	WT	L1	L1+L2	0.100557	0.197017	0.0562046
TCGA-BC-A10T-01A-11R-A131-07	Grp2	0.153866	Hepatocellular Carcinoma	HCC	MALE	76	WHITE	Cirrhosis/Fibrosis		G1/G2	None		HBV.neg	0	1	1.63836	1	2.29315	0.142044	0.464466	33	HRD High	WT	-0.171815	WT	2	2	0.0319864	-0.0273766	0.0953065
TCGA-BC-A10U-01A-11R-A131-07	Grp1	-0.152115	Hepatocellular Carcinoma	HCC	MALE	69	WHITE			G1/G2	None		HBV.pos	2.32193	1	1.60548	1	2.29315	-0.71832	-0.544064	13	HRD Low	p53 mut	-0.326825	WT	L3	L3	-0.14753	-0.422018	-0.0788911
TCGA-BC-A10W-01A-11R-A131-07	Grp2	0.557233	Hepatocellular Carcinoma	Blast_Like	MALE	50	ASIAN			G3/G4	None		HBV.pos	14.4822	1	0.249315	1	0.249315	1.52825	0.339546	24	HRD High	WT	0.482248	p53 mutant	2	2	-0.277312	-0.306645	0.313848
TCGA-BC-A10X-01A-11R-A131-07	Grp1	-0.384071	Hepatocellular Carcinoma	HCC	FEMALE	52	WHITE		Stage III/IV	G1/G2	Macro/Micro		HBV.pos	1.58496	0	2.10959	1	2.10959	-1.81777	-0.113973	0	HRD Low	WT	-0.774981	WT	L1	L1+L2	0.232119	0.43241	-0.0844999
TCGA-BC-A10Y-01A-11R-A131-07	Grp2	0.511206	Hepatocellular Carcinoma	HCC	MALE	76	WHITE			G3/G4	Macro/Micro		HBV.neg	0	1	1.09589	1	1.94795	1.57441	-0.168418	29	HRD High	WT	0.487179	p53 mutant	2	2	-0.323802	-0.198077	0.00185448
TCGA-BC-A10Z-01A-11R-A131-07	Grp2	0.315451	Hepatocellular Carcinoma	HCC	FEMALE	62	WHITE		Stage I	G1/G2	None	T1	HBV.pos	5.12928	0	0.0931507	1	0.0931507	-0.0457103	-1.00291	19	HRD Low	WT	0.287529	p53 mutant	2	2	0.210968	0.458709	0.0142998
TCGA-BC-A110-01A-11R-A131-07	Grp1	-0.522514	Hepatocellular Carcinoma	HCC	FEMALE	51	BLACK			G1/G2	None	T1	HBV.neg	0	1	5	0	5	-3.02596	0.449304			WT	-0.745078	WT	L1	L1+L2	0.204799	0.298386	0.0164773
TCGA-BC-A112-01A-11R-A131-07	Grp2	0.338478	Hepatocellular Carcinoma	CCA_Like	MALE	80	WHITE	No		G1/G2	None	T3/T4	HBV.neg	0	0	0.419178	1	0.419178	0.402597	-0.0328354			WT	-0.0485335	WT	2	2	-0.319216	-0.751359	0.461992
TCGA-BC-A216-01A-11R-A155-07	Grp2	0.593657	Hepatocellular Carcinoma	HCC	FEMALE	62	WHITE	No	Stage III/IV	G1/G2	None	T3/T4	HBV.neg	0	0	3.70137	0	3.70137	1.58669	0.647467	20	HRD High	p53 mut	0.675824	p53 mutant	2	2	-0.0923575	-0.272276	-0.0415621
TCGA-BC-A217-01A-11R-A155-07	Grp2	0.638283	Hepatocellular Carcinoma	HCC	FEMALE	75	WHITE	No	Stage II	G3/G4	None	T2	HBV.neg	0	0	3.8274	1	3.8274	1.43909	-1.04449	34	HRD High	p53 mut	0.567448	p53 mutant	2	2	-0.412174	-0.42578	0.277316
TCGA-BC-A3KF-01A-11R-A213-07	Grp1	-0.0558582	Hepatocellular Carcinoma	HCC	FEMALE	66	WHITE		Stage I	G1/G2	None	T1	HBV.neg	0	0	0.0219178	0	0.0219178	-0.0657014	0.0656494	34	HRD High	WT	-0.10182	WT	L2	L1+L2	0.199611	0.214166	-0.177243
TCGA-BC-A3KG-01A-11R-A213-07	Grp2	0.969977	Hepatocellular Carcinoma	Blast_Like	FEMALE	68	WHITE		Stage II	G3/G4	None	T2	HBV.neg	0	1	0.572603	0	1.86301	2.25665	-0.630965			WT	0.532365	p53 mutant	2	2	-0.145924	-0.611453	0.195105
TCGA-BC-A5W4-01A-11R-A28V-07	Grp1	-0.110466	Hepatocellular Carcinoma	HCC	MALE	69	WHITE		Stage III/IV	G3/G4	Macro/Micro	T3/T4	HBV.neg	0	1	1.05205	1	1.49863	-0.055227	-0.773264	30	HRD High	p53 mut	0.025537	p53 mutant	L2	L1+L2	-0.221363	-0.350718	0.021818
TCGA-BC-A69H-01A-11R-A311-07	Grp2	0.100418	Hepatocellular Carcinoma	Blast_Like	MALE	64	WHITE		Stage II	G3/G4	None	T2	HBV.neg	0	0	1.21644	0	1.21644	0.82568	0.540342	23	HRD High	p53 mut	0.675264	p53 mutant	2	2	-0.195329	-0.383814	0.715333
TCGA-BC-A69I-01A-11R-A311-07	Grp1	-0.500591	Hepatocellular Carcinoma	HCC	MALE	69	WHITE		Stage I	G1/G2	None	T1	HBV.neg	0	0	1.06027	0	1.06027	-1.80688	-0.115989			WT	-0.636647	WT	L1	L1+L2	0.0720414	0.172159	-0.0291444
TCGA-BC-A8YO-01A-11R-A37K-07	Grp2	0.691206	Hepatocellular Carcinoma	Blast_Like	FEMALE	66	WHITE		Stage III/IV	G3/G4	Macro/Micro	T3/T4	HBV.pos	5.49185	1	0.60274	0	1.53973	1.57739	0.570697	19	HRD Low	p53 mut	0.648779	p53 mutant	2	2	-0.245149	-0.191877	0.232846
TCGA-BD-A2L6-01A-11R-A213-07	Grp2	0.35633	Hepatocellular Carcinoma	HCC	MALE	69	WHITE	Cirrhosis/Fibrosis		G1/G2	None	T2	HBV.neg	0	1	1.13699	0	3.73425	1.48134	0.0496714	13	HRD Low	WT	0.553692	p53 mutant	2	2	-0.066135	0.386508	-0.019452
TCGA-BD-A3EP-01A-11R-A22L-07	Grp1	-0.0926781	Hepatocellular Carcinoma	HCC	FEMALE	75	BLACK	Cirrhosis/Fibrosis	Stage I	G1/G2	None	T1	HBV.neg	0	0	1.12055	0	1.12055	-0.677989	-0.651429	18	HRD Low	p53 mut	-0.429714	WT	L3	L3	-0.0691365	-0.204284	-0.015037
TCGA-BD-A3ER-01A-11R-A213-07	Grp1	-0.342934	Hepatocellular Carcinoma	HCC	MALE	62	WHITE	Cirrhosis/Fibrosis	Stage II	G1/G2	None	T2		0	1	0.619178	0	3.05479	-1.6618	0.0773068			WT	-0.6791	WT	L1	L1+L2	0.265876	0.369115	-0.0304299
TCGA-BW-A5NO-01A-11R-A27V-07	Grp1	0.0366639	Hepatocellular Carcinoma	HCC	MALE	50	BLACK	Cirrhosis/Fibrosis	Stage III/IV	G1/G2	Macro/Micro	T3/T4	HBV.neg	0	0	0.0547945	0	0.0547945	0.266025	-0.199836	25	HRD High	p53 mut	-0.0789065	WT	L3	L3	-0.15811	0.119814	0.121302
TCGA-BW-A5NP-01A-11R-A27V-07	Grp2	0.187253	Hepatocellular Carcinoma	Blast_Like	FEMALE	26	WHITE	Cirrhosis/Fibrosis	Stage III/IV	G3/G4	None	T2	HBV.pos	15.0959	1	0.279452	0	0	0.228468	0.124095			WT	0.185754	p53 mutant	2	2	-0.287601	-0.629911	0.24468
TCGA-BW-A5NQ-01A-11R-A27V-07	Grp2	0.776129	Hepatocellular Carcinoma	Blast_Like	MALE	63	WHITE	Cirrhosis/Fibrosis	Stage I	G3/G4	None	T1	HBV.pos	2.32193	0	0	0	0	1.53354	0.637282	3	HRD Low	p53 mut	0.702671	p53 mutant	2	2	-0.393983	-0.337761	0.654811
TCGA-CC-5258-01A-01R-A131-07	Grp2	0.342967	Hepatocellular Carcinoma	Blast_Like	MALE	48	ASIAN		Stage II	G1/G2	None	T2	HBV.pos	10.6751	0	0.353425	1	0.353425	1.20642	0.0534794	26	HRD High	p53 mut	0.540184	p53 mutant	2	2	-0.236154	-0.403968	0.424333
TCGA-CC-5259-01A-31R-A213-07	Grp1	-0.602421	Hepatocellular Carcinoma	HCC	FEMALE	60	ASIAN		Stage III/IV	G1/G2	Macro/Micro	T3/T4	HBV.pos	8.20457	1	0.493151	0	0.684932	0.679374	0.206592			p53 mut	0.51333	p53 mutant	L2	L1+L2	-0.0510709	-0.0142804	0.266842
TCGA-CC-5260-01A-01R-A131-07	Grp2	0.357738	Hepatocellular Carcinoma	CCA_Like	FEMALE	61	ASIAN		Stage III/IV	G1/G2	None	T3/T4	HBV.pos	1.58496	0	0.238356	1	0.238356	0.649866	0.434094	17	HRD Low	WT	-0.189556	WT	2	2	-0.920135	-1.38282	-0.149523
TCGA-CC-5261-01A-01R-A131-07	Grp2	0.332593	Hepatocellular Carcinoma	CCA_Like	MALE	44	ASIAN		Stage II	G1/G2	None	T2	HBV.pos	3.70044	0	0.265753	1	0.265753	0.21489	0.0954633			WT	-0.226425	WT	2	2	-0.546908	-0.922209	-0.185481
TCGA-CC-5262-01A-01R-A131-07	Grp1	0.0366342	Hepatocellular Carcinoma	HCC	MALE	67	ASIAN		Stage III/IV	G1/G2	None	T3/T4	HBV.pos	9.34651	0	0.282192	1	0.282192	0.345175	0.360566	14	HRD Low	WT	0.221751	p53 mutant	L3	L3	0.0791214	0.127715	0.149298
TCGA-CC-5263-01A-01R-A131-07	Grp2	0.661777	Hepatocellular Carcinoma	Blast_Like	MALE	35	ASIAN		Stage III/IV	G1/G2	None	T3/T4	HBV.pos	8.83605	0	0.353425	1	0.353425	1.95753	0.0334907	34	HRD High	p53 mut	0.611062	p53 mutant	2	2	-0.333216	-0.635438	0.291726
TCGA-CC-5264-01A-01R-A131-07	Grp2	0.666082	Hepatocellular Carcinoma	Blast_Like	MALE	71	ASIAN		Stage III/IV	G1/G2	Macro/Micro	T3/T4	HBV.pos	15.5615	0	0.279452	1	0.279452	1.52457	0.598025	26	HRD High	WT	0.505342	p53 mutant	2	2	-0.274341	-0.363486	0.167641
TCGA-CC-A123-01A-11R-A131-07	Grp1	-0.0980565	Hepatocellular Carcinoma	Blast_Like	FEMALE	24	ASIAN		Stage III/IV	G1/G2	None	T3/T4	HBV.pos	15.4467	0	0.6	0	0.6	0.298315	0.0116008			WT	0.443157	p53 mutant	L2	L1+L2	-0.209805	-0.522508	0.527513
TCGA-CC-A1HT-01A-11R-A131-07	Grp2	0.724597	Hepatocellular Carcinoma	Blast_Like	MALE	50	ASIAN		Stage III/IV	G3/G4	None	T3/T4	HBV.pos	12.0617	0	0.276712	1	0.276712	1.85252	0.527326	26	HRD High	p53 mut	0.582918	p53 mutant	2	2	-0.64759	-0.999216	0.471242
TCGA-CC-A3M9-01A-11R-A213-07	Grp2	0.636712	Hepatocellular Carcinoma	Blast_Like	MALE	45	ASIAN		Stage III/IV	G3/G4	None	T3/T4	HBV.pos	8.94544	1	0.6	1	0.821918	2.03969	0.119833	37	HRD High	p53 mut	0.350635	p53 mutant	2	2	-0.826083	-1.3994	0.657492
TCGA-CC-A3MA-01A-11R-A213-07	Grp2	0.563089	Hepatocellular Carcinoma	CCA_Like	MALE	61	ASIAN		Stage III/IV	G1/G2	None	T3/T4	HBV.pos	4.75489	1	0.715068	1	0.830137	0.935756	0.79219	35	HRD High	p53 mut	0.452612	p53 mutant	2	2	-0.623159	-1.03035	0.1814
TCGA-CC-A3MB-01A-11R-A213-07	Grp2	0.516343	Hepatocellular Carcinoma	HCC	MALE	36	ASIAN		Stage III/IV	G1/G2	Macro/Micro	T3/T4	HBV.pos	17.3769	0	0.863014	1	0.863014	1.05249	0.135224	27	HRD High	p53 mut	0.622237	p53 mutant	2	2	-0.130546	0.135361	0.228021
TCGA-CC-A3MC-01A-11R-A22L-07	Grp2	0.151412	Hepatocellular Carcinoma	HCC	MALE	54	ASIAN		Stage III/IV	G1/G2	None	T3/T4	HBV.pos	10.0098	1	0.813699	0	0.994521	0.611856	1.0461	25	HRD High	WT	0.527076	p53 mutant	2	2	0.119389	0.223258	0.220523
TCGA-CC-A5UC-01A-11R-A28V-07	Grp2	0.539652	Hepatocellular Carcinoma	Blast_Like	MALE	63	ASIAN		Stage III/IV	G3/G4	Macro/Micro	T3/T4	HBV.pos	10.6393	0	0.950685	1	0.950685	1.28633	0.871448	19	HRD Low	WT	0.495636	p53 mutant	2	2	-0.10567	-0.23776	0.590041
TCGA-CC-A5UD-01A-11R-A28V-07	Grp2	0.568042	Hepatocellular Carcinoma	Blast_Like	MALE	45	ASIAN		Stage III/IV	G1/G2	None	T3/T4	HBV.pos	14.094	1	0.49863	1	0.832877	1.50086	0.322786	23	HRD High	p53 mut	0.478779	p53 mutant	2	2	-0.328871	-0.385369	0.264202
TCGA-CC-A5UE-01A-11R-A28V-07	Grp2	0.512442	Hepatocellular Carcinoma	Blast_Like	MALE	48	ASIAN		Stage III/IV	G1/G2	None	T3/T4	HBV.pos	14.3819	1	0.479452	1	0.745205	1.53036	0.130386	34	HRD High	p53 mut	0.679322	p53 mutant	2	2	-0.126135	-0.0976718	0.310572
TCGA-CC-A7IE-01A-21R-A38B-07	Grp2	0.309384	Hepatocellular Carcinoma	Blast_Like	MALE	57	ASIAN		Stage III/IV	G1/G2	Macro/Micro	T3/T4	HBV.pos	9.10591	0	0.594521	1	0.594521	1.07249	0.584639	28	HRD High	WT	0.300733	p53 mutant	2	2	-0.343919	-0.88303	0.532996
TCGA-CC-A7IF-01A-11R-A33J-07	Grp2	0.243856	Hepatocellular Carcinoma	HCC	MALE	59	ASIAN		Stage III/IV	G1/G2	Macro/Micro	T3/T4	HBV.pos	3.45943	0	1.77808	1	1.77808	0.589054	0.607948	23	HRD High	WT	0.463629	p53 mutant	2	2	-0.137597	-0.153143	-0.141016
TCGA-CC-A7IG-01A-11R-A33J-07	Grp2	0.28629	Hepatocellular Carcinoma	Blast_Like	MALE	47	ASIAN		Stage II	G1/G2	None	T2	HBV.pos	13.2439	1	0.534247	1	0.819178	1.04632	-0.0655419	63	HRD High	p53 mut	0.688279	p53 mutant	2	2	-0.211419	-0.616732	0.597007
TCGA-CC-A7IH-01A-11R-A33J-07	Grp1	-0.273718	Hepatocellular Carcinoma	HCC	MALE	58	ASIAN		Stage III/IV	G1/G2	Macro/Micro	T3/T4	HBV.neg	0	0	1	0	1	-0.648084	-0.636402	11	HRD Low	WT	-0.0553394	WT	L3	L3	-0.0835612	0.117906	-0.136975
TCGA-CC-A7II-01A-11R-A33J-07	Grp2	1.1116	Hepatocellular Carcinoma	Blast_Like	MALE	54	ASIAN		Stage III/IV	G3/G4	Macro/Micro	T3/T4	HBV.pos	12.9394	1	0.761644	0	1.09315	2.27405	1.02496	25	HRD High	p53 mut	0.753428	p53 mutant	2	2	-0.855427	-1.35122	1.01451
TCGA-CC-A7IJ-01A-11R-A33R-07	Grp2	0.819034	Hepatocellular Carcinoma	Blast_Like	MALE	56	ASIAN		Stage II	G3/G4	None	T2	HBV.pos	6.91886	0	1.04658	0	1.04658	1.94666	0.930925	31	HRD High	p53 mut	0.442452	p53 mutant	2	2	-0.586604	-1.40395	0.611051
TCGA-CC-A7IK-01A-12R-A33R-07	Grp2	0.294201	Hepatocellular Carcinoma	Blast_Like	MALE	59	ASIAN		Stage III/IV	G3/G4	None	T3/T4	HBV.pos	14.8914	1	0.410959	1	0.717808	1.01867	-0.76217	14	HRD Low	WT	0.513973	p53 mutant	2	2	-0.344144	-0.437611	0.181081
TCGA-CC-A7IL-01A-11R-A33R-07	Grp1	-0.107993	Hepatocellular Carcinoma	HCC	MALE	61	ASIAN		Stage III/IV	G1/G2	None	T3/T4	HBV.pos	12.4107	1	0.490411	1	0.761644	-0.320089	0.22389	19	HRD Low	WT	0.348361	p53 mutant	L3	L3	0.244442	0.601152	0.0669277
TCGA-CC-A8HS-01A-11R-A36F-07	Grp2	0.571744	Hepatocellular Carcinoma	Blast_Like	MALE	18	ASIAN		Stage III/IV	G1/G2	None	T3/T4	HBV.pos	10.5068	1	0.550685	1	0.821918	1.06164	0.490011			p53 mut	0.5569	p53 mutant	2	2	-0.335477	-0.748846	0.18367
TCGA-CC-A8HT-01A-11R-A36F-07	Grp2	0.673354	Hepatocellular Carcinoma	Blast_Like	MALE	74	ASIAN		Stage III/IV	G1/G2	None	T3/T4	HBV.pos	12.316	1	0.227397	1	0.383562	2.05727	0.0145598	13	HRD Low	p53 mut	0.697443	p53 mutant	2	2	-0.328708	-0.309351	0.270657
TCGA-CC-A8HU-01A-11R-A36F-07	Grp2	0.460606	Hepatocellular Carcinoma	Blast_Like	FEMALE	39	ASIAN		Stage III/IV	G3/G4	None	T3/T4	HBV.pos	8.86109	1	0.824658	1	0.942466	1.7121	-0.590032	34	HRD High	p53 mut	0.658093	p53 mutant	2	2	-0.12545	-0.334925	0.248766
TCGA-CC-A8HV-01A-11R-A36F-07	Grp2	0.220781	Hepatocellular Carcinoma	Blast_Like	FEMALE	51	ASIAN		Stage II	G1/G2	None	T2	HBV.neg	0	1	0.408219	1	0.764384	1.194	-0.232683	39	HRD High	p53 mut	0.582251	p53 mutant	2	2	-0.415186	-0.918622	0.0295672
TCGA-CC-A9FS-01A-11R-A37K-07	Grp2	0.145455	Hepatocellular Carcinoma	HCC	MALE	55	ASIAN		Stage II	G1/G2	None	T2	HBV.pos	16.0934	0	0.578082	0	0.578082	-0.552164	0.0394651	23	HRD High	WT	-0.063476	WT	2	2	-0.0561422	0.0379926	0.0447662
TCGA-CC-A9FU-01A-11R-A37K-07	Grp2	0.400257	Hepatocellular Carcinoma	Blast_Like	FEMALE	52	ASIAN		Stage III/IV	G1/G2	Macro/Micro	T3/T4	HBV.pos	15.6715	0	0	0	0	1.60522	0.0355887	31	HRD High	WT	0.452149	p53 mutant	2	2	-0.342879	-0.564352	0.416857
TCGA-CC-A9FV-01A-11R-A37K-07	Grp1	-0.312723	Hepatocellular Carcinoma	HCC	MALE	57	ASIAN		Stage III/IV	G1/G2	None	T3/T4	HBV.neg	0	0	0	0	0	-1.84896	-0.0598117	0	HRD Low	WT	-0.707718	WT	L1	L1+L2	-0.181532	-0.808293	-0.34071
TCGA-CC-A9FW-01A-11R-A37K-07	Grp2	0.152064	Hepatocellular Carcinoma	HCC	MALE	68	ASIAN		Stage III/IV	G1/G2	None	T3/T4	HBV.pos	17.5905	1	0.419178	0	0.679452	0.142873	-0.374051	21	HRD High	WT	-0.210937	WT	2	2	-0.290384	-0.417261	0.181812
TCGA-DD-A113-01A-11R-A131-07	Grp2	0.41404	Hepatocellular Carcinoma	HCC	FEMALE	55	WHITE	No	Stage II	G3/G4	None	T2	HBV.neg	0	1	4.59178	0	5	0.840439	0.503653	31	HRD High	WT	-0.0100234	WT	2	2	-0.102804	-0.00404012	0.110336
TCGA-DD-A114-01A-11R-A131-07	Grp2	0.565653	Hepatocellular Carcinoma	CCA_Like	MALE	42	BLACK	Cirrhosis/Fibrosis	Stage II	G3/G4	Macro/Micro	T2	HBV.neg	0	0	3.14795	1	3.14795	1.52431	0.495717	11	HRD Low	p53 mut	0.368765	p53 mutant	2	2	-0.415527	-0.817005	0.0469614
TCGA-DD-A115-01A-11R-A131-07	Grp2	0.25952	Hepatocellular Carcinoma	HCC	MALE	53	WHITE	No	Stage III/IV	G1/G2	Macro/Micro		HBV.neg	0	1	1.28493	0	5	0.824161	0.332445	26	HRD High	WT	0.458287	p53 mutant	2	2	0.0859758	-0.00884797	-0.120367
TCGA-DD-A116-01A-11R-A131-07	Grp1	-0.0836395	Hepatocellular Carcinoma	HCC	MALE	68	ASIAN	Cirrhosis/Fibrosis	Stage III/IV	G3/G4	None		HBV.pos	15.4307	1	2.26849	1	4.44384	-0.834746	0.550086	16	HRD Low	WT	0.0320614	p53 mutant	L2	L1+L2	0.0902234	0.0346403	0.0892507
TCGA-DD-A118-01A-11R-A131-07	Grp1	-0.266302	Hepatocellular Carcinoma	HCC	FEMALE	77	WHITE	No	Stage II	G1/G2	None	T2	HBV.neg	0	1	1.80274	0	5	-0.561158	0.216558	19	HRD Low	WT	-0.128054	WT	L3	L3	0.286098	-0.199242	0.0905911
TCGA-DD-A119-01A-11R-A131-07	Grp1	-0.52293	Hepatocellular Carcinoma	HCC	MALE	40	ASIAN	No	Stage III/IV	G3/G4	Macro/Micro	T3/T4	HBV.pos	10.851	0	0.610959	1	0.610959	-0.985677	-0.355164	17	HRD Low	WT	-0.332813	WT	L2	L1+L2	0.0269281	0.147193	0.224483
TCGA-DD-A11A-01A-11R-A131-07	Grp2	0.179548	Hepatocellular Carcinoma	HCC	MALE	67	BLACK	No	Stage I	G3/G4	None	T1	HBV.pos	13.5032	0	0.216438	0	0.216438	-0.660637	0.247771	46	HRD High	p53 mut	0.223172	p53 mutant	2	2	0.333046	0.319657	-0.0324901
TCGA-DD-A11B-01A-11R-A131-07	Grp1	-0.189966	Hepatocellular Carcinoma	HCC	MALE	73	WHITE	Cirrhosis/Fibrosis	Stage I	G1/G2		T1	HBV.neg	0	0	0.0383562	1	0.0383562	-1.25433	-0.654726	7	HRD Low	WT	-0.333144	WT	L1	L1+L2	0.0210738	0.375894	-0.21464
TCGA-DD-A11C-01A-11R-A131-07	Grp2	0.415548	Hepatocellular Carcinoma	HCC	MALE	69	WHITE	No	Stage I	G3/G4	None	T1	HBV.neg	0	0	1.8137	0	1.8137	0.855958	-0.219928	40	HRD High	WT	0.301482	p53 mutant	2	2	0.00109851	-0.0912907	-0.0126727
TCGA-DD-A11D-01A-11R-A131-07	Grp1	-0.438978	Hepatocellular Carcinoma	HCC	FEMALE	57	WHITE	Cirrhosis/Fibrosis	Stage I	G1/G2	None	T1	HBV.neg	0	1	1.36438	1	4.27397	-1.75962	0.00369594	5	HRD Low	WT	-0.520952	WT	L3	L3	0.137235	0.415379	-0.369466
TCGA-DD-A1EA-01A-11R-A131-07	Grp1	-0.188083	Hepatocellular Carcinoma	HCC	MALE	68	ASIAN	Cirrhosis/Fibrosis	Stage II	G1/G2	None		HBV.pos	16.4345	1	2.06575	0	5	-0.262382	-0.350656			WT	-0.438039	WT	L1	L1+L2	-0.136171	-0.278882	-0.275527
TCGA-DD-A1EB-01A-11R-A131-07	Grp1	-0.301744	Hepatocellular Carcinoma	HCC	FEMALE	72		No	Stage I	G1/G2	None		HBV.neg	0	1	1.38356	0	5	-2.22439	0.181703	22	HRD High	p53 mut	-0.570064	WT	L1	L1+L2	0.225071	0.209127	-0.309656
TCGA-DD-A1EC-01A-21R-A131-07	Grp1	-0.00213774	Hepatocellular Carcinoma	HCC	FEMALE	20	WHITE	No	Stage I	G3/G4	Macro/Micro	T1	HBV.neg	0	1	0.819178	0	1.64932	-0.34164	0.381486	11	HRD Low	WT	-0.438298	WT	L3	L3	-0.206674	-0.698726	0.0314151
TCGA-DD-A1ED-01A-11R-A155-07	Grp1	-0.404828	Hepatocellular Carcinoma	HCC	MALE	68	WHITE	No	Stage I	G1/G2	None	T1	HBV.neg	0	0	5	0	5	-4.10859	-0.908643	0	HRD Low	WT	-0.718319	WT	L1	L1+L2	0.146029	0.377672	-0.204495
TCGA-DD-A1EE-01A-11R-A131-07	Grp1	-0.0605242	Hepatocellular Carcinoma	HCC	MALE	73	WHITE	Cirrhosis/Fibrosis	Stage III/IV	G3/G4	Macro/Micro	T3/T4	HBV.neg	0	1	0.120548	1	0.956164	-0.499056	-0.858523	7	HRD Low	p53 mut	-0.10755	WT	L3	L3	-0.104632	-0.199129	-0.0251841
TCGA-DD-A1EF-01A-11R-A131-07	Grp1	-0.0317509	Hepatocellular Carcinoma	Blast_Like	FEMALE	57	WHITE	Cirrhosis/Fibrosis	Stage I	G3/G4	Macro/Micro	T1	HBV.neg	0	1	1.07945	1	1.07945	0.399784	-0.376349	24	HRD High	WT	-0.0399218	WT	L3	L3	-0.291786	-0.695345	0.060995
TCGA-DD-A1EG-01A-11R-A213-07	Grp1	0.0106007	Hepatocellular Carcinoma	HCC	MALE	76	WHITE	Cirrhosis/Fibrosis	Stage I	G3/G4		T1	HBV.neg	0	1	2.39726	1	3.7589	0.209839	-0.123384			WT	0.360518	p53 mutant	L3	L3	-0.0472749	0.157151	0.336961
TCGA-DD-A1EH-01A-11R-A131-07	Grp2	0.173805	Hepatocellular Carcinoma	HCC	MALE	23	WHITE	Cirrhosis/Fibrosis	Stage III/IV	G3/G4	None	T3/T4	HBV.pos	1.58496	1	0.328767	0	4.09589	0.0668103	-0.352686	9	HRD Low	WT	-0.27374	WT	2	2	-0.366467	-0.768901	-0.0878324
TCGA-DD-A1EI-01A-11R-A131-07	Grp2	0.276952	Hepatocellular Carcinoma	HCC	MALE	46	ASIAN	Cirrhosis/Fibrosis	Stage I	G1/G2	None	T1	HBV.pos	15.2002	0	0.50137	0	0.50137	0.0268722	0.860859	18	HRD Low	p53 mut	0.149725	p53 mutant	2	2	-0.118619	-0.135218	0.290805
TCGA-DD-A1EJ-01A-11R-A155-07	Grp2	0.386344	Hepatocellular Carcinoma	Blast_Like	FEMALE	71	WHITE	No	Stage III/IV	G1/G2	None	T1	HBV.neg	0	1	0.720548	1	2.75342	0.768618	-0.125219	16	HRD Low	WT	0.184637	p53 mutant	2	2	-0.0902389	0.121237	0.258779
TCGA-DD-A1EK-01A-11R-A213-07	Grp1	-0.181926	Hepatocellular Carcinoma	HCC	FEMALE	64	WHITE	No	Stage III/IV	G1/G2	None	T3/T4	HBV.pos	1.58496	1	0.457534	1	1.52877	-0.507625	-0.434385	15	HRD Low	WT	-0.405146	WT	L3	L3	0.325469	0.243137	-0.358341
TCGA-DD-A1EL-01A-11R-A155-07	Grp2	0.455909	Hepatocellular Carcinoma	Blast_Like	MALE	23	BLACK	No	Stage II	G3/G4	None	T2	HBV.pos	13.9983	1	1.13699	1	1.13699	0.887865	-0.167776	33	HRD High	p53 mut	0.615053	p53 mutant	2	2	-0.0614119	0.215548	0.627531
TCGA-DD-A39V-01A-11R-A213-07	Grp1	-0.0852036	Hepatocellular Carcinoma	Blast_Like	MALE	77	WHITE	No	Stage II	G3/G4	Macro/Micro		HBV.neg	0	1	1.24658	1	1.76164	-0.240404	0.421221	6	HRD Low	WT	-0.123216	WT	L2	L1+L2	-0.234612	-0.263795	0.477452
TCGA-DD-A39W-01A-11R-A213-07	Grp1	-0.0407848	Hepatocellular Carcinoma	HCC	FEMALE	29	WHITE		Stage III/IV	G1/G2	Macro/Micro		HBV.neg	0	0	2.26575	1	2.26575	-1.83809	-1.26911	7	HRD Low	WT	-0.529941	WT	L1	L1+L2	-0.05523	-0.256579	0.00113931
TCGA-DD-A39X-01A-11R-A213-07	Grp1	-0.405473	Hepatocellular Carcinoma	HCC	FEMALE	78	WHITE	No	Stage I	G1/G2	None		HBV.neg	0	1	2.8274	1	4.6411	-0.318603	0.0258145	16	HRD Low	WT	-0.224821	WT	L2	L1+L2	0.0378698	0.197219	0.31674
TCGA-DD-A39Y-01A-11R-A213-07	Grp2	0.278438	Hepatocellular Carcinoma	Blast_Like	MALE	67	ASIAN	No	Stage I	G3/G4	Macro/Micro		HBV.neg	0	0	0.468493	1	0.468493	1.35247	0.198325			WT	0.798612	p53 mutant	2	2	-0.108765	-0.241003	0.643326
TCGA-DD-A39Z-01A-11R-A213-07	Grp1	-0.117803	Hepatocellular Carcinoma	HCC	FEMALE	43			Stage II	G1/G2	Macro/Micro		HBV.neg	0	0	1.64658	1	1.64658	0.403849	0.325495	11	HRD Low	WT	0.516374	p53 mutant	L2	L1+L2	-0.0766079	-0.267032	0.152471
TCGA-DD-A3A1-01A-11R-A213-07	Grp1	-0.254103	Hepatocellular Carcinoma	HCC	MALE	65		No	Stage III/IV	G1/G2	Macro/Micro		HBV.neg	0	0	0.638356	1	0.638356	0.303158	-0.513598			WT	-0.080893	WT	L2	L1+L2	0.153691	0.254283	0.198385
TCGA-DD-A3A2-01A-11R-A213-07	Grp1	-0.378194	Hepatocellular Carcinoma	HCC	FEMALE	76	WHITE	No	Stage I	G1/G2	None		HBV.neg	0	0	5	0	5	-3.4242	0.0175103	1	HRD Low	WT	-0.59845	WT	L1	L1+L2	0.605319	0.732261	-0.3005
TCGA-DD-A3A3-01A-11R-A22L-07	Grp1	-0.279829	Hepatocellular Carcinoma	HCC	MALE	45	ASIAN	No	Stage I	G1/G2	None		HBV.pos	10.3208	0	1.46575	1	1.46575	0.254719	-0.288395	8	HRD Low	WT	0.420237	p53 mutant	L2	L1+L2	0.0320222	0.0946605	0.234262
TCGA-DD-A3A4-01A-11R-A22L-07	Grp1	-0.448611	Hepatocellular Carcinoma	HCC	MALE	37	WHITE	No	Stage III/IV	G3/G4	None		HBV.neg	0	1	0.238356	1	1.67671	-2.25595	-0.15188	8	HRD Low	WT	-0.287695	WT	L1	L1+L2	0.117599	0.178023	0.111813
TCGA-DD-A3A5-01A-11R-A22L-07	Grp2	0.143288	Hepatocellular Carcinoma	HCC	FEMALE	66	WHITE	No	Stage III/IV	G1/G2	Macro/Micro		HBV.neg	0	1	0.230137	0	5	0.942592	-0.0309983	17	HRD Low	WT	0.435072	p53 mutant	2	2	0.0709084	0.0842714	0.0902639
TCGA-DD-A3A6-01A-11R-A22L-07	Grp1	-0.684224	Hepatocellular Carcinoma	HCC	FEMALE	72	WHITE	No	Stage II	G1/G2	None		HBV.neg	0	0	5	0	5	-1.55257	0.209363	0	HRD Low	WT	-0.639077	WT	L2	L1+L2	-0.241099	-1.03213	-0.377485
TCGA-DD-A3A7-01A-11R-A22L-07	Grp1	-0.366803	Hepatocellular Carcinoma	HCC	MALE	67		No	Stage III/IV	G3/G4	None	T3/T4	HBV.neg	0	1	0.394521	1	1.14795	0.83644	0.443016	32	HRD High	p53 mut	0.531422	p53 mutant	L2	L1+L2	-0.184959	-0.639306	0.0770874
TCGA-DD-A3A8-01A-11R-A22L-07	Grp1	-0.628721	Hepatocellular Carcinoma	HCC	MALE	75	WHITE	No	Stage II	G1/G2	None		HBV.neg	0	0	0.030137	1	0.030137	-1.62011	-0.0109913	14	HRD Low	WT	-0.375768	WT	L1	L1+L2	0.227601	0.474472	-0.028475
TCGA-DD-A3A9-01A-11R-A266-07	Grp1	-0.573977	Hepatocellular Carcinoma	HCC	FEMALE	64	WHITE	No	Stage III/IV	G1/G2	None		HBV.neg	0	1	0.791781	1	2.55068	-0.56424	-0.00499262	20	HRD High	WT	-0.341723	WT	L2	L1+L2	-0.0812224	-0.433294	0.134398
TCGA-DD-A4NA-01A-11R-A266-07	Grp2	0.174528	Hepatocellular Carcinoma	CCA_Like	FEMALE	67	WHITE	Cirrhosis/Fibrosis	Stage III/IV	G3/G4	None	T2	HBV.neg	0	0	2.76164	0	2.76164	-0.540166	0.180696	24	HRD High	WT	-0.332986	WT	2	2	-0.344286	-1.23378	-0.155703
TCGA-DD-A4NB-01A-12R-A266-07	Grp1	-0.337533	Fibrolamellar Carcinoma	HCC	MALE	25	WHITE		Stage I	G1/G2	None	T1	HBV.neg	0	1	2.49863	0	2.70959	-1.66102	0.342072	0	HRD Low	WT	-0.70709	WT	L1	L1+L2	0.101455	-0.0537225	-0.268931
TCGA-DD-A4ND-01A-11R-A266-07	Grp2	0.182584	Hepatocellular Carcinoma	HCC	FEMALE	56	WHITE	No	Stage I	G3/G4	None	T1	HBV.neg	0	0	5	0	5	0.552228	0.601019	14	HRD Low	WT	-0.440096	WT	2	2	-0.164491	-0.0867237	-0.099337
TCGA-DD-A4NE-01A-11R-A27V-07	Grp2	0.501985	Hepatocellular Carcinoma	HCC	FEMALE	75	WHITE	No	Stage III/IV	G3/G4	None	T3/T4	HBV.neg	0	1	0.520548	1	1.80822	1.35009	0.35918			WT	0.434678	p53 mutant	2	2	0.0366316	0.316964	0.0520325
TCGA-DD-A4NF-01A-11R-A27V-07	Grp1	-0.29623	Hepatocellular Carcinoma	HCC	MALE	72	WHITE	Cirrhosis/Fibrosis	Stage I	G1/G2	Macro/Micro	T1	HBV.neg	0	1	1.79726	0	2.58082	-3.89194	-0.871157	4	HRD Low	WT	-0.580309	WT	L1	L1+L2	0.221217	0.318177	-0.0577287
TCGA-DD-A4NG-01A-11R-A27V-07	Grp1	-0.206332	Hepatocellular Carcinoma	HCC	MALE	77	WHITE		Stage III/IV	G1/G2	None	T3/T4	HBV.neg	0	1	1.17808	1	2.19726	-0.871813	0.328799			WT	-0.20513	WT	L3	L3	-0.202549	-0.25413	-0.012733
TCGA-DD-A4NH-01A-11R-A27V-07	Grp2	0.154958	Hepatocellular Carcinoma	CCA_Like	FEMALE	65	WHITE	Cirrhosis/Fibrosis	Stage III/IV	G3/G4	Macro/Micro	T3/T4	HBV.neg	0	1	0.441096	0	2.51233	0.264952	0.250106	23	HRD High	WT	0.1752	p53 mutant	2	2	-0.462968	-1.05199	-0.186653
TCGA-DD-A4NI-01A-11R-A27V-07	Grp1	-0.208459	Hepatocellular Carcinoma	HCC	MALE	67	WHITE	No	Stage II	G1/G2		T2	HBV.neg	0	0	2.23562	0	2.23562	-2.31972	0.0794571	8	HRD Low	WT	-0.74721	WT	L1	L1+L2	0.155617	0.369004	-0.232407
TCGA-DD-A4NJ-01A-11R-A27V-07	Grp2	0.470124	Hepatocellular Carcinoma	HCC	FEMALE	54	WHITE	Cirrhosis/Fibrosis	Stage II	G1/G2	Macro/Micro	T2	HBV.neg	0	1	1.50411	0	2.54247	0.877762	0.0317563			WT	0.359515	p53 mutant	2	2	-0.246453	-0.22523	-0.0294462
TCGA-DD-A4NK-01A-11R-A28V-07	Grp1	-0.325704	Hepatocellular Carcinoma	HCC	FEMALE	80	WHITE	No	Stage III/IV	G1/G2	None	T3/T4	HBV.neg	0	1	0.243836	1	3.31507	-1.9543	-0.573447	8	HRD Low	WT	-0.65643	WT	L1	L1+L2	0.19184	0.432299	-0.301266
TCGA-DD-A4NL-01A-11R-A28V-07	Grp1	-0.339219	Hepatocellular Carcinoma	HCC	MALE	46	WHITE	No	Stage I	G1/G2	None	T1	HBV.neg	0	0	4.68767	0	4.68767	-2.60003	-0.19077	0	HRD Low	WT	-0.707236	WT	L1	L1+L2	0.143877	0.540968	-0.375517
TCGA-DD-A4NN-01A-11R-A28V-07	Grp2	0.370577	Hepatocellular Carcinoma	Blast_Like	FEMALE	56	WHITE	No	Stage I	G3/G4	None	T1	HBV.pos	3.16993	1	0.454795	1	2.46301	1.14707	0.0194896	34	HRD High	WT	0.150358	p53 mutant	2	2	-0.675699	-0.822542	0.277077
TCGA-DD-A4NO-01A-11R-A28V-07	Grp1	-0.32344	Hepatocellular Carcinoma	HCC	MALE	65	WHITE	No	Stage I	G1/G2	None	T1	HBV.pos	2.32193	1	2.71233	0	5	-2.16956	-0.162499	11	HRD Low	WT	-0.677744	WT	L1	L1+L2	5.34827e-05	0.132528	-0.153272
TCGA-DD-A4NP-01A-11R-A28V-07	Grp1	-0.379497	Hepatocellular Carcinoma	HCC	MALE	32	WHITE	No	Stage I	G3/G4	None	T1	HBV.neg	0	1	3.52329	0	5	-4.04144	-0.436206	0	HRD Low	WT	-0.640578	WT	L1	L1+L2	0.215947	0.386441	-0.0988711
TCGA-DD-A4NQ-01A-21R-A28V-07	Grp2	0.309129	Hepatocellular Carcinoma	HCC	MALE	60	WHITE		Stage II	G3/G4	None	T2	HBV.neg	0	1	0.345205	1	1.02192	1.08138	0.647531	14	HRD Low	p53 mut	0.599365	p53 mutant	2	2	0.0726125	0.11288	0.21271
TCGA-DD-A4NR-01A-11R-A311-07	Grp2	0.260447	Hepatocellular Carcinoma	Blast_Like	FEMALE	85	WHITE	Cirrhosis/Fibrosis	Stage I	G3/G4	None	T1	HBV.neg	0	0	0.0246575	1	0.0246575	0.836107	0.347932	14	HRD Low	WT	0.17061	p53 mutant	2	2	-0.189305	-0.205058	0.180789
TCGA-DD-A4NS-01A-11R-A311-07	Grp1	-0.310694	Hepatocellular Carcinoma	CCA_Like	FEMALE	61	WHITE	No	Stage I	G1/G2	None	T1	HBV.neg	0	1	2.44658	0	5	-1.90195	-0.00480202	8	HRD Low	WT	-0.764546	WT	L1	L1+L2	-0.187937	-0.170523	-0.362017
TCGA-DD-A4NV-01A-11R-A311-07	Grp1	-0.197737	Hepatocellular Carcinoma	HCC	MALE	61	WHITE	No	Stage III/IV	G1/G2		T3/T4	HBV.neg	0	0	5	0	5	-1.72216	-0.116259	8	HRD Low	WT	-0.706444	WT	L3	L3	0.127237	0.260426	-0.46479
TCGA-DD-A73A-01A-12R-A32O-07	Grp1	-0.193403	Hepatocellular Carcinoma	HCC	MALE	71	WHITE	Cirrhosis/Fibrosis	Stage I	G1/G2	None	T1	HBV.neg	0	0	1.99452	0	1.99452	-0.5645	-0.0135539	12	HRD Low	WT	-0.394968	WT	L3	L3	0.104942	0.446167	-0.130582
TCGA-DD-A73B-01A-12R-A32O-07	Grp2	0.380384	Hepatocellular Carcinoma	HCC	FEMALE	72	WHITE	Cirrhosis/Fibrosis	Stage I	G1/G2	None	T1	HBV.neg	0	1	0.657534	1	0.775342	0.484666	-0.095319	38	HRD High	WT	0.456963	p53 mutant	2	2	0.120791	0.347321	-0.09934
TCGA-DD-A73C-01A-12R-A33J-07	Grp1	-0.268772	Hepatocellular Carcinoma	HCC	FEMALE	65	WHITE	No	Stage III/IV	G1/G2	None	T3/T4	HBV.neg	0	1	1.55068	0	1.92055	-2.24074	-0.325115	2	HRD Low	WT	-0.708771	WT	L1	L1+L2	0.380559	0.362587	-0.188476
TCGA-DD-A73D-01A-12R-A32O-07	Grp1	-0.357732	Hepatocellular Carcinoma	HCC	FEMALE	68	WHITE	Cirrhosis/Fibrosis	Stage II	G1/G2	None	T2	HBV.neg	0	1	1.62192	0	1.89863	-1.67666	-0.548744	10	HRD Low	WT	-0.164303	WT	L1	L1+L2	-0.0274139	-0.108473	-0.0101291
TCGA-DD-A73E-01A-12R-A32O-07	Grp1	-0.241496	Hepatocellular Carcinoma	HCC	MALE	66	WHITE	No	Stage I	G1/G2		T1	HBV.neg	0	0	0.120548	0	0.120548	-1.65377	-0.30395	17	HRD Low	WT	-0.265864	WT	L1	L1+L2	-0.00190557	-0.192055	-0.161506
TCGA-DD-A73F-01A-11R-A32O-07	Grp2	0.300779	Hepatocellular Carcinoma	HCC	FEMALE	77	WHITE	No	Stage I	G1/G2	Macro/Micro	T1	HBV.neg	0	0	2.9726	0	2.9726	0.766211	-0.165516	20	HRD High	WT	0.239154	p53 mutant	2	2	0.309984	0.322203	-0.0736234
TCGA-DD-A73G-01A-22R-A32O-07	Grp1	-0.593962	Hepatocellular Carcinoma	HCC	FEMALE	73	WHITE	No	Stage I	G3/G4	None	T1	HBV.neg	0	0	5	0	5	0.0826409	-0.194203	29	HRD High	WT	0.120169	p53 mutant	L2	L1+L2	0.189153	-0.281088	0.437718
TCGA-DD-AA3A-01A-11R-A37K-07	Grp2	0.720528	Hepatocholangiocarcinoma (Mixed)	CCA_Like	FEMALE	81	WHITE	No	Stage I	G3/G4	None	T1	HBV.neg	0	0	1.12329	1	1.12329	1.43498	0.445325	17	HRD Low	WT	0.352063	p53 mutant	2	2	-0.647373	-1.49698	0.326013
TCGA-DD-AAC8-01A-11R-A41C-07	Grp1	-0.167492	Hepatocellular Carcinoma	Blast_Like	MALE	72	ASIAN	Cirrhosis/Fibrosis	Stage I	G3/G4	None	T1	HBV.pos	2.80735	0	0.0438356	1	0.0438356	-2.47671	-0.493552	11	HRD Low	p53 mut	-0.385512	WT	L1	L1+L2	-0.237983	-0.531317	0.300104
TCGA-DD-AAC9-01A-11R-A41C-07	Grp1	-0.368247	Hepatocellular Carcinoma	HCC	MALE	51	ASIAN	Cirrhosis/Fibrosis	Stage I	G1/G2	None	T1	HBV.pos	16.5598	0	0.950685	0	0.950685	-1.44569	-0.572164	9	HRD Low	WT	-0.623844	WT	L1	L1+L2	0.156364	0.296156	0.120043
TCGA-DD-AACA-01A-11R-A41C-07	Grp2	0.244962	Hepatocellular Carcinoma	HCC	MALE	65	ASIAN	Cirrhosis/Fibrosis	Stage I	G3/G4	None	T1		0	1	2.12603	0	5	0.407202	0.15877	19	HRD Low	WT	0.265628	p53 mutant	2	2	-0.0859232	-0.292577	0.0882761
TCGA-DD-AACA-02A-11R-A41C-07	Grp1	0.0205048	Hepatocellular Carcinoma	HCC	MALE	65	ASIAN	Cirrhosis/Fibrosis	Stage I	G3/G4	None	T1		0	1	2.12603	0	5	-0.457408	0.254292	19	HRD Low	WT	0.175451	p53 mutant	L3	L3	-0.210774	-0.128058	-0.179689
TCGA-DD-AACA-02B-11R-A41C-07	Grp2	0.202479	Hepatocellular Carcinoma	HCC	MALE	65	ASIAN	Cirrhosis/Fibrosis	Stage I	G3/G4	Macro/Micro	T1		0	1	2.12603	0	5	0.66983	0.308211	19	HRD Low	WT	0.61752	p53 mutant	2	2	0.0437759	-0.185507	0.329185
TCGA-DD-AACB-01A-11R-A41C-07	Grp2	0.133883	Hepatocellular Carcinoma	Blast_Like	FEMALE	74	ASIAN	Cirrhosis/Fibrosis	Stage I	G3/G4	Macro/Micro	T1	HBV.pos	6.98868	0	5	0	5	0.503428	-0.192645	19	HRD Low	p53 mut	0.254785	p53 mutant	2	2	-0.2042	-0.0973442	0.426769
TCGA-DD-AACC-01A-11R-A41C-07	Grp2	0.121481	Hepatocellular Carcinoma	HCC	MALE	61	ASIAN	Cirrhosis/Fibrosis	Stage I	G1/G2	None	T1	HBV.pos	10.9076	1	1.47123	1	4.61644	0.546137	-0.314695	28	HRD High	WT	0.205251	p53 mutant	2	2	-0.0813039	-0.0875959	0.129071
TCGA-DD-AACD-01A-11R-A41C-07	Grp1	-0.293098	Hepatocellular Carcinoma	HCC	MALE	48	ASIAN	Cirrhosis/Fibrosis	Stage I	G3/G4	Macro/Micro	T1	HBV.pos	16.9498	1	0.413699	1	1.04384	-0.644085	0.0549119	13	HRD Low	WT	0.0306341	p53 mutant	L2	L1+L2	0.00668974	0.0675065	0.394749
TCGA-DD-AACE-01A-11R-A41C-07	Grp1	-0.383808	Hepatocellular Carcinoma	HCC	MALE	62	ASIAN	Cirrhosis/Fibrosis	Stage I	G3/G4	Macro/Micro	T1	HBV.pos	14.0581	1	3.50411	0	5	-1.13327	-0.448404	6	HRD Low	p53 mut	-0.218174	WT	L3	L3	0.0701463	-0.0420341	-0.380917
TCGA-DD-AACF-01A-11R-A41C-07	Grp2	0.32685	Hepatocellular Carcinoma	HCC	MALE	68	ASIAN	Cirrhosis/Fibrosis	Stage I	G3/G4	None	T1	HBV.pos	7.57743	1	0.326027	1	1	0.310903	0.416848	14	HRD Low	p53 mut	0.531579	p53 mutant	2	2	-0.0679702	-0.199975	0.263987
TCGA-DD-AACG-01A-11R-A41C-07	Grp2	0.295545	Hepatocellular Carcinoma	Blast_Like	MALE	52	ASIAN	Cirrhosis/Fibrosis	Stage II	G3/G4	None	T2	HBV.pos	4.24793	1	0.342466	1	1.28493	0.447799	0.107014	26	HRD High	p53 mut	0.679494	p53 mutant	2	2	0.0255934	-0.0848963	0.647923
TCGA-DD-AACH-01A-11R-A41C-07	Grp2	0.752396	Hepatocellular Carcinoma	Blast_Like	MALE	69	ASIAN	Cirrhosis/Fibrosis	Stage II	G3/G4	None	T2	HBV.pos	6.62936	1	0.227397	1	0.534247	1.52094	0.961434	52	HRD High	WT	0.408536	p53 mutant	2	2	-0.0312152	-0.234417	0.236581
TCGA-DD-AACI-01A-11R-A41C-07	Grp1	-0.27939	Hepatocellular Carcinoma	HCC	MALE	69	ASIAN	Cirrhosis/Fibrosis	Stage II	G3/G4	Macro/Micro	T2	HBV.pos	5.61471	1	3.92329	0	4.43288	-0.976914	0.266027	25	HRD High	WT	-0.222169	WT	L2	L1+L2	-0.0503273	-0.211898	0.24907
TCGA-DD-AACJ-01A-11R-A41C-07	Grp1	-0.489423	Hepatocellular Carcinoma	HCC	MALE	75	ASIAN		Stage II	G1/G2	None	T2	HBV.pos	7.29462	1	0.273973	0	5	-2.14732	-0.661079	8	HRD Low	WT	-0.292638	WT	L1	L1+L2	0.19743	0.0167979	0.181666
TCGA-DD-AACK-01A-11R-A41C-07	Grp1	0.0137968	Hepatocellular Carcinoma	HCC	MALE	70	ASIAN	Cirrhosis/Fibrosis	Stage I	G1/G2	None	T1	HBV.pos	16.5388	0	0.0246575	0	0.0246575	-0.524218	-0.231531	6	HRD Low	WT	-0.209656	WT	L3	L3	0.238647	0.500118	0.239721
TCGA-DD-AACL-01A-11R-A41C-07	Grp2	0.303104	Hepatocellular Carcinoma	Blast_Like	FEMALE	66	ASIAN		Stage I	G3/G4	None	T1	HBV.pos	1.58496	0	0.293151	1	0.293151	0.664372	0.615386	14	HRD Low	p53 mut	0.718685	p53 mutant	2	2	-0.322849	-0.591819	0.521664
TCGA-DD-AACN-01A-11R-A41C-07	Grp1	-0.322088	Hepatocellular Carcinoma	HCC	MALE	32	ASIAN		Stage I	G3/G4	Macro/Micro	T1	HBV.pos	16.8569	1	0.978082	0	3.56712	-1.55914	-0.256608	20	HRD High	WT	-0.642002	WT	L1	L1+L2	-0.342937	-0.547876	-0.0675599
TCGA-DD-AACO-01A-11R-A41C-07	Grp1	0.0872605	Hepatocellular Carcinoma	HCC	MALE	40	ASIAN	Cirrhosis/Fibrosis	Stage I	G3/G4	Macro/Micro	T1	HBV.pos	14.4506	1	1.31233	0	5	-0.679134	0.00133538	17	HRD Low	WT	0.257192	p53 mutant	L2	L1+L2	-0.178192	0.0891351	0.142061
TCGA-DD-AACP-01A-11R-A41C-07	Grp2	0.767518	Hepatocellular Carcinoma	Blast_Like	MALE	64	ASIAN		Stage I	G3/G4	Macro/Micro	T1	HBV.pos	13.553	0	1.13699	0	1.13699	1.89667	0.853453	10	HRD Low	WT	0.626235	p53 mutant	2	2	-0.350127	-0.427749	0.708367
TCGA-DD-AACQ-01A-11R-A41C-07	Grp1	-0.101611	Hepatocellular Carcinoma	HCC	MALE	50	ASIAN		Stage II	G3/G4		T2	HBV.pos	15.0779	1	0.287671	1	1.18356	-0.555101	0.177677	26	HRD High	p53 mut	0.171245	p53 mutant	L2	L1+L2	0.102098	-0.0212523	-0.237856
TCGA-DD-AACS-01A-11R-A41C-07	Grp2	0.220651	Hepatocellular Carcinoma	HCC	MALE	39	ASIAN		Stage I	G3/G4	Macro/Micro	T1	HBV.pos	14.1945	0	4.94247	0	4.94247	0.00938243	0.226017	33	HRD High	p53 mut	0.414016	p53 mutant	2	2	-0.189565	-0.391232	0.0420269
TCGA-DD-AACT-01A-11R-A41C-07	Grp1	-0.234602	Hepatocellular Carcinoma	HCC	FEMALE	69	ASIAN		Stage I	G1/G2	Macro/Micro	T1	HBV.pos	13.356	0	4.27945	0	4.27945	-0.132241	-0.0281751	8	HRD Low	WT	-0.38229	WT	L2	L1+L2	0.195878	-0.0174639	-0.228897
TCGA-DD-AACU-01A-11R-A41C-07	Grp1	0.0570285	Hepatocellular Carcinoma	HCC	MALE	59	ASIAN		Stage I	G3/G4	Macro/Micro	T1	HBV.pos	7.49985	0	4.29315	0	4.29315	-0.704621	-0.423867	21	HRD High	p53 mut	-0.427022	WT	L3	L3	-0.244722	0.0629145	-0.0929773
TCGA-DD-AACV-01A-11R-A41C-07	Grp2	0.677005	Hepatocellular Carcinoma	HCC	MALE	53	ASIAN		Stage I	G3/G4	Macro/Micro	T1	HBV.pos	17.5858	1	0.942466	0	4.19452	1.68922	-0.35975	25	HRD High	p53 mut	0.651134	p53 mutant	2	2	-0.192262	-0.082901	0.0317369
TCGA-DD-AACW-01A-11R-A41C-07	Grp2	0.288596	Hepatocellular Carcinoma	HCC	MALE	43	ASIAN		Stage I	G3/G4		T1	HBV.pos	15.9513	0	3.90137	0	3.90137	0.767758	-0.300958	15	HRD Low	WT	0.488086	p53 mutant	2	2	-0.228242	-0.364503	0.211972
TCGA-DD-AACX-01A-11R-A41C-07	Grp2	0.145515	Hepatocellular Carcinoma	HCC	MALE	66	ASIAN	Cirrhosis/Fibrosis	Stage II	G3/G4		T2	HBV.neg	0	1	0.115068	0	0.465753	0.486978	-0.243141	12	HRD Low	WT	0.480624	p53 mutant	2	2	0.11637	-0.264718	-0.0475378
TCGA-DD-AACY-01A-11R-A41C-07	Grp1	-0.469739	Hepatocellular Carcinoma	HCC	MALE	61	ASIAN	Cirrhosis/Fibrosis	Stage I	G3/G4	Macro/Micro	T1	HBV.neg	0	1	2.12603	0	3.9726	-1.89971	-0.961679	22	HRD High	WT	-0.527378	WT	L1	L1+L2	0.114737	-0.0438254	0.0443659
TCGA-DD-AACZ-01A-11R-A41C-07	Grp2	0.41651	Hepatocellular Carcinoma	Blast_Like	FEMALE	63	ASIAN		Stage I	G3/G4	Macro/Micro	T1	HBV.pos	1.58496	1	0.241096	1	0.468493	1.08952	0.313153	29	HRD High	p53 mut	0.432443	p53 mutant	2	2	-0.305862	-0.468416	0.546445
TCGA-DD-AAD0-01A-11R-A41C-07	Grp2	0.127456	Hepatocellular Carcinoma	HCC	FEMALE	73	ASIAN		Stage I	G1/G2	Macro/Micro	T1	HBV.pos	17.2105	1	0.128767	0	0.375342	0.388953	0.283341	23	HRD High	WT	0.358487	p53 mutant	2	2	0.00456316	-0.0961438	-0.184204
TCGA-DD-AAD1-01A-11R-A41C-07	Grp1	-0.172068	Hepatocellular Carcinoma	CCA_Like	FEMALE	51	ASIAN		Stage I	G3/G4	Macro/Micro	T1	HBV.pos	9.70217	1	0.347945	0	1.54521	-1.28601	0.164148	20	HRD High	WT	-0.666125	WT	L3	L3	-0.319921	-0.425217	-0.115536
TCGA-DD-AAD2-01A-11R-A41C-07	Grp1	-0.16441	Hepatocellular Carcinoma	HCC	MALE	66	ASIAN	Cirrhosis/Fibrosis	Stage I	G1/G2	Macro/Micro	T1	HBV.pos	8.12412	0	1.80274	0	1.80274	0.303927	0.115202	8	HRD Low	WT	-0.0391548	WT	L3	L3	0.0971468	0.18633	0.0526967
TCGA-DD-AAD3-01A-11R-A41C-07	Grp1	-0.259402	Hepatocellular Carcinoma	HCC	MALE	43	ASIAN	Cirrhosis/Fibrosis	Stage I	G1/G2		T1	HBV.pos	9.40301	0	3.54795	0	3.54795	-0.894507	-0.0986908	21	HRD High	p53 mut	-0.580054	WT	L3	L3	0.000348151	0.0685322	-0.301828
TCGA-DD-AAD5-01A-11R-A41C-07	Grp2	0.384534	Hepatocellular Carcinoma	Blast_Like	MALE	54	ASIAN	Cirrhosis/Fibrosis	Stage I	G3/G4		T1	HBV.pos	15.4174	1	0.356164	0	3.68493	0.905122	0.146691	34	HRD High	p53 mut	0.590287	p53 mutant	2	2	-0.130178	-0.524116	0.372757
TCGA-DD-AAD6-01A-11R-A41C-07	Grp2	0.315701	Hepatocellular Carcinoma	HCC	MALE	66	ASIAN		Stage III/IV	G3/G4	Macro/Micro	T3/T4	HBV.pos	13.9284	1	0.136986	0	1.8411	0.994339	0.771813	15	HRD Low	WT	0.493021	p53 mutant	2	2	-0.32779	-0.291961	0.113933
TCGA-DD-AAD8-01A-11R-A41C-07	Grp2	0.381206	Hepatocellular Carcinoma	HCC	FEMALE	73	ASIAN	Cirrhosis/Fibrosis	Stage I	G1/G2	Macro/Micro	T1	HBV.pos	1.58496	0	3.33973	0	3.33973	0.664137	-0.196225	14	HRD Low	p53 mut	0.170943	p53 mutant	2	2	-0.0751334	0.125319	-0.0176649
TCGA-DD-AADA-01A-11R-A41C-07	Grp1	-0.439159	Hepatocellular Carcinoma	HCC	FEMALE	66	ASIAN		Stage I	G3/G4	Macro/Micro	T1	HBV.pos	9.39874	0	3.37808	0	3.37808	-1.30439	-0.383955	18	HRD Low	WT	-0.626747	WT	L1	L1+L2	-0.140555	-0.301709	-0.230811
TCGA-DD-AADB-01A-11R-A41C-07	Grp2	0.273022	Hepatocellular Carcinoma	Blast_Like	MALE	51	ASIAN		Stage I	G3/G4	Macro/Micro	T1	HBV.neg	0	0	3.40274	0	3.40274	0.768985	0.1142	17	HRD Low	p53 mut	0.617688	p53 mutant	2	2	-0.386274	-0.658156	0.357301
TCGA-DD-AADC-01A-11R-A41C-07	Grp2	0.618469	Hepatocellular Carcinoma	Blast_Like	MALE	53	ASIAN		Stage I	G3/G4	None	T1	HBV.pos	13.1298	1	0.276712	1	1.16438	1.46242	0.207475	39	HRD High	p53 mut	0.626501	p53 mutant	2	2	-0.300078	-0.381017	0.511726
TCGA-DD-AADD-01A-11R-A41C-07	Grp2	0.314528	Hepatocellular Carcinoma	Blast_Like	MALE	51	ASIAN		Stage I	G3/G4	None	T1	HBV.pos	16.0386	0	3.3726	0	3.3726	1.50364	-0.0843324	16	HRD Low	p53 mut	0.424936	p53 mutant	2	2	-0.364188	-0.475967	0.0442391
TCGA-DD-AADF-01A-11R-A41C-07	Grp2	0.206215	Hepatocellular Carcinoma	HCC	FEMALE	64	ASIAN		Stage I	G3/G4		T1	HBV.pos	17.5512	0	0.315068	1	0.315068	0.623734	-0.845097	39	HRD High	WT	0.445311	p53 mutant	2	2	-0.0427663	-0.0357186	0.0440872
TCGA-DD-AADG-01A-11R-A41C-07	Grp1	-0.226346	Hepatocellular Carcinoma	HCC	MALE	70	ASIAN	Cirrhosis/Fibrosis	Stage III/IV	G3/G4		T3/T4	HBV.pos	16.4374	1	0.739726	0	3.13699	-1.10819	-0.540737	13	HRD Low	WT	-0.270103	WT	L3	L3	0.381192	0.256572	-0.0884155
TCGA-DD-AADI-01A-11R-A41C-07	Grp1	-0.160101	Hepatocellular Carcinoma	HCC	FEMALE	43	ASIAN		Stage I	G3/G4	None	T1	HBV.neg	0	0	2.9726	0	2.9726	-0.518387	-0.527151	13	HRD Low	WT	-0.354305	WT	L2	L1+L2	-0.309211	-0.613247	0.318157
TCGA-DD-AADJ-01A-11R-A41C-07	Grp1	-0.249441	Hepatocellular Carcinoma	HCC	FEMALE	70	ASIAN		Stage I	G3/G4	None	T1	HBV.pos	2.32193	0	2.92055	0	2.92055	-0.657448	-0.145182	14	HRD Low	WT	-0.157335	WT	L2	L1+L2	0.0472546	0.197772	0.181115
TCGA-DD-AADK-01A-11R-A41C-07	Grp1	-0.121648	Hepatocellular Carcinoma	HCC	FEMALE	68	ASIAN	Cirrhosis/Fibrosis	Stage II	G3/G4	None	T2	HBV.pos	13.6372	0	2.87397	0	2.87397	-0.286001	0.33964	17	HRD Low	WT	-0.0827779	WT	L2	L1+L2	0.177758	0.126659	0.0476385
TCGA-DD-AADL-01A-11R-A41C-07	Grp2	0.261447	Hepatocellular Carcinoma	HCC	MALE	58	ASIAN		Stage I	G3/G4		T1	HBV.pos	17.7208	0	1.74247	0	1.74247	-0.00938243	-0.168137	19	HRD Low	p53 mut	0.233894	p53 mutant	2	2	0.00775043	0.000524452	-0.12234
TCGA-DD-AADM-01A-11R-A41C-07	Grp1	-0.0596155	Hepatocellular Carcinoma	HCC	MALE	58	ASIAN		Stage II	G3/G4		T2	HBV.pos	15.0219	0	0.0328767	1	0.0328767	0.426636	0.21596	31	HRD High	WT	0.472783	p53 mutant	L2	L1+L2	0.166456	0.192442	0.331914
TCGA-DD-AADN-01A-11R-A41C-07	Grp1	0.0332515	Hepatocellular Carcinoma	Blast_Like	MALE	59	ASIAN		Stage I	G3/G4		T1	HBV.pos	13.5719	0	2.46027	0	2.46027	0.895467	0.283758	24	HRD High	p53 mut	0.687512	p53 mutant	L2	L1+L2	-0.365056	-0.398768	0.542231
TCGA-DD-AADO-01A-11R-A41C-07	Grp1	-0.116419	Hepatocellular Carcinoma	HCC	MALE	55	ASIAN		Stage I	G3/G4		T1	HBV.pos	10.4988	0	1.2411	0	1.2411	-0.283432	0.0329024	38	HRD High	WT	0.233259	p53 mutant	L2	L1+L2	-0.107674	-0.405491	0.621542
TCGA-DD-AADP-01A-11R-A39D-07	Grp1	-0.0201766	Hepatocellular Carcinoma	HCC	MALE	45	ASIAN		Stage I	G3/G4		T1	HBV.pos	19.105	0	1.25479	0	1.25479	-0.321513	-0.289382	23	HRD High	WT	-0.012195	WT	L3	L3	-0.0579379	-0.0524296	-0.0280419
TCGA-DD-AADQ-01A-11R-A41C-07	Grp1	-0.262576	Hepatocellular Carcinoma	HCC	MALE	59	ASIAN		Stage II	G3/G4	Macro/Micro	T2	HBV.pos	5.20945	0	1.19452	0	1.19452	-0.606784	0.044082	9	HRD Low	WT	-0.0600573	WT	L2	L1+L2	-0.139364	0.068949	0.205075
TCGA-DD-AADR-01A-11R-A41C-07	Grp2	0.180481	Hepatocellular Carcinoma	HCC	MALE	58	ASIAN	Cirrhosis/Fibrosis	Stage I	G3/G4	Macro/Micro	T1	HBV.pos	15.8875	1	4.65753	0	5	0.0429138	0.0481226			p53 mut	0.361703	p53 mutant	2	2	0.239376	0.247538	0.29083
TCGA-DD-AADS-01A-11R-A41C-07	Grp1	-0.364604	Hepatocellular Carcinoma	HCC	MALE	63	ASIAN		Stage I	G1/G2	None	T1	HBV.neg	0	0	1.29863	0	1.29863	-0.828883	-0.216936	0	HRD Low	WT	-0.371631	WT	L2	L1+L2	-0.026781	-0.000524452	-0.0187709
TCGA-DD-AADU-01A-11R-A41C-07	Grp1	-0.407823	Hepatocellular Carcinoma	HCC	MALE	60	ASIAN	Cirrhosis/Fibrosis	Stage II	G3/G4	None	T2	HBV.pos	18.663	0	1.51781	0	1.51781	-2.68072	-0.742156	13	HRD Low	WT	-0.566649	WT	L1	L1+L2	0.174175	0.114763	-0.127429
TCGA-DD-AADV-01A-11R-A39D-07	Grp2	0.428524	Hepatocellular Carcinoma	HCC	MALE	50	ASIAN	Cirrhosis/Fibrosis	Stage I	G3/G4	None	T1	HBV.pos	18.5175	0	1.5726	0	1.5726	0.770039	0.208126	23	HRD High	p53 mut	0.55399	p53 mutant	2	2	-0.0786342	-0.068083	0.164298
TCGA-DD-AADW-01A-11R-A39D-07	Grp2	0.612502	Hepatocellular Carcinoma	CCA_Like	MALE	48	ASIAN	Cirrhosis/Fibrosis	Stage I	G3/G4	None	T1	HBV.pos	6.89482	1	1.05753	0	1.60822	0.927069	0.59543	37	HRD High	p53 mut	0.222916	p53 mutant	2	2	-0.260016	-0.729325	0.0760887
TCGA-DD-AADY-01A-11R-A41C-07	Grp1	-0.177293	Hepatocellular Carcinoma	HCC	FEMALE	55	ASIAN	Cirrhosis/Fibrosis	Stage I	G1/G2		T1	HBV.pos	6.37504	0	1.52055	0	1.52055	-0.271517	-0.136969	30	HRD High	WT	-0.267904	WT	L3	L3	-0.0182197	-0.694962	-0.102307
TCGA-DD-AAE0-01A-11R-A41C-07	Grp2	0.316258	Hepatocellular Carcinoma	CCA_Like	FEMALE	45	ASIAN	Cirrhosis/Fibrosis	Stage III/IV	G3/G4	None	T3/T4	HBV.pos	8.9629	0	1.52055	0	1.52055	1.37961	0.707771	21	HRD High	p53 mut	0.442961	p53 mutant	2	2	-0.74673	-1.19339	0.326176
TCGA-DD-AAE1-01A-11R-A41C-07	Grp1	-0.111407	Hepatocellular Carcinoma	HCC	MALE	52	ASIAN	Cirrhosis/Fibrosis	Stage I	G3/G4		T1	HBV.pos	2.80735	0	1.51233	0	1.51233	-1.15313	-0.59132	16	HRD Low	WT	-0.205404	WT	L3	L3	-0.328906	-0.332062	-0.0547032
TCGA-DD-AAE2-01A-11R-A41C-07	Grp1	-0.00643031	Hepatocellular Carcinoma	HCC	MALE	51	ASIAN	Cirrhosis/Fibrosis	Stage I	G3/G4	Macro/Micro	T1	HBV.pos	17.074	0	1.74795	0	1.74795	0.141022	-0.0971048	25	HRD High	WT	-0.252559	WT	L3	L3	0.324661	0.350074	-0.231878
TCGA-DD-AAE3-01A-11R-A41C-07	Grp1	-0.590763	Hepatocellular Carcinoma	HCC	MALE	50	ASIAN	Cirrhosis/Fibrosis	Stage I	G1/G2		T1	HBV.pos	17.1683	0	1.55068	0	1.55068	-3.17159	0.099006	21	HRD High	WT	-0.624187	WT	L1	L1+L2	0.0168616	0.173583	0.231129
TCGA-DD-AAE4-01A-11R-A41C-07	Grp2	0.133256	Hepatocellular Carcinoma	HCC	FEMALE	49	ASIAN	Cirrhosis/Fibrosis	Stage I	G1/G2	Macro/Micro	T1	HBV.pos	14.2836	1	0.30411	0	1.66575	0.710582	-0.337419	15	HRD Low	WT	0.213075	p53 mutant	2	2	0.148118	0.346214	0.339826
TCGA-DD-AAE6-01A-11R-A41C-07	Grp2	0.273102	Hepatocellular Carcinoma	HCC	FEMALE	59	ASIAN	Cirrhosis/Fibrosis	Stage I	G1/G2		T1	HBV.pos	11.5093	1	0.287671	0	0.386301	1.82188	-0.686797	41	HRD High	p53 mut	0.570296	p53 mutant	2	2	-0.17468	-0.108888	-0.0499799
TCGA-DD-AAE7-01A-11R-A41C-07	Grp1	-0.392246	Hepatocellular Carcinoma	HCC	MALE	72	ASIAN	Cirrhosis/Fibrosis	Stage I	G1/G2	None	T1	HBV.neg	0	0	1.76438	0	1.76438	-1.98922	0.268494	8	HRD Low	WT	-0.725837	WT	L1	L1+L2	0.158792	0.21397	0.0019164
TCGA-DD-AAE9-01A-11R-A41C-07	Grp1	-0.293704	Hepatocellular Carcinoma	HCC	MALE	69	ASIAN	Cirrhosis/Fibrosis	Stage I	G3/G4	Macro/Micro	T1	HBV.neg	0	0	1.97808	0	1.97808	-0.572586	0.029229	9	HRD Low	WT	0.228458	p53 mutant	L3	L3	-0.01394	0.0990291	-0.157417
TCGA-DD-AAEA-01A-11R-A41C-07	Grp2	0.159864	Hepatocellular Carcinoma	HCC	MALE	65	ASIAN	Cirrhosis/Fibrosis	Stage I	G3/G4	None	T1	HBV.pos	1.58496	0	1.57534	0	1.57534	0.41881	-0.255825	19	HRD Low	p53 mut	0.541493	p53 mutant	2	2	-0.260009	-0.111673	-0.0841463
TCGA-DD-AAEB-01A-11R-A41C-07	Grp1	-0.534644	Hepatocellular Carcinoma	HCC	MALE	60	ASIAN		Stage I	G1/G2	None	T1	HBV.pos	15.5838	0	1.30959	0	1.30959	-1.71266	0.245678	7	HRD Low	WT	-0.443196	WT	L1	L1+L2	0.132873	0.0852161	-0.135591
TCGA-DD-AAED-01A-12R-A41C-07	Grp1	-0.187763	Hepatocellular Carcinoma	HCC	MALE	51	ASIAN	Cirrhosis/Fibrosis	Stage I	G3/G4	None	T1	HBV.pos	11.0258	1	0.542466	0	2.09041	0.0131516	-0.896475	20	HRD High	p53 mut	-0.0121315	WT	L2	L1+L2	-0.532031	-0.920333	-0.254731
TCGA-DD-AAEE-01A-11R-A41C-07	Grp2	0.154446	Hepatocellular Carcinoma	HCC	MALE	55	ASIAN	Cirrhosis/Fibrosis	Stage I	G3/G4	None	T1	HBV.pos	13.5518	1	0.613699	0	2.21918	0.209775	0.0107127	32	HRD High	WT	0.364753	p53 mutant	2	2	-0.0579319	0.0274632	0.151961
TCGA-DD-AAEG-01A-11R-A39D-07	Grp1	-0.0122037	Hepatocellular Carcinoma	HCC	FEMALE	59	ASIAN	Cirrhosis/Fibrosis	Stage I	G3/G4	None	T1	HBV.neg	0	0	1.96986	0	1.96986	-0.269473	0.179058	18	HRD Low	WT	-0.326046	WT	L2	L1+L2	0.379307	0.404721	0.112102
TCGA-DD-AAEH-01A-11R-A41C-07	Grp1	-0.208001	Hepatocellular Carcinoma	HCC	MALE	73	ASIAN	Cirrhosis/Fibrosis	Stage I	G1/G2	None	T1	HBV.pos	1.58496	1	1.76438	0	2.14795	-0.437411	-0.00788129	14	HRD Low	WT	-0.310016	WT	L2	L1+L2	0.00406956	0.265016	-0.143346
TCGA-DD-AAEI-01A-11R-A41C-07	Grp1	-0.144578	Hepatocellular Carcinoma	HCC	MALE	72	ASIAN	Cirrhosis/Fibrosis	Stage I	G1/G2	Macro/Micro	T1	HBV.neg	0	1	1.34521	0	4.19452	0.480603	0.181438	16	HRD Low	p53 mut	0.610437	p53 mutant	L3	L3	0.200033	0.467875	0.273823
TCGA-DD-AAEK-01A-11R-A41C-07	Grp1	-0.214854	Hepatocellular Carcinoma	HCC	MALE	51	ASIAN	Cirrhosis/Fibrosis	Stage II	G3/G4	None	T2	HBV.pos	17.9089	0	2.92329	0	2.92329	-0.476156	-0.603634	29	HRD High	WT	-0.311888	WT	L3	L3	-0.00585851	-0.127739	-0.253428
TCGA-DD-AAVP-01A-11R-A41C-07	Grp1	-0.462927	Hepatocellular Carcinoma	HCC	MALE	48	ASIAN	Cirrhosis/Fibrosis	Stage I	G1/G2	Macro/Micro	T1	HBV.pos	12.5918	1	2.47397	0	5	-0.592021	-0.907683	28	HRD High	WT	-0.273598	WT	L2	L1+L2	0.218613	0.172549	0.236779
TCGA-DD-AAVQ-01A-11R-A41C-07	Grp2	0.268827	Hepatocellular Carcinoma	Blast_Like	MALE	38	ASIAN	Cirrhosis/Fibrosis	Stage I	G1/G2	None	T1	HBV.pos	11.1079	1	4.13425	0	5	0.986307	0.280367	18	HRD Low	WT	0.459637	p53 mutant	2	2	-0.235108	-0.488839	0.0402368
TCGA-DD-AAVR-01A-11R-A41C-07	Grp1	-0.316385	Hepatocellular Carcinoma	HCC	MALE	44	ASIAN	Cirrhosis/Fibrosis	Stage I	G1/G2	None	T1	HBV.neg	0	0	5	0	5	-0.214653	-0.781276	13	HRD Low	WT	-0.519997	WT	L2	L1+L2	0.163092	0.275864	0.283021
TCGA-DD-AAVS-01A-11R-A41C-07	Grp2	0.131925	Hepatocellular Carcinoma	HCC	MALE	56	ASIAN	Cirrhosis/Fibrosis	Stage I	G1/G2	None	T1	HBV.pos	11.8746	0	4.99452	0	4.99452	0.265709	0.248388	20	HRD High	WT	-0.0374711	WT	2	2	-0.257902	-0.351125	-0.00494289
TCGA-DD-AAVU-01A-11R-A41C-07	Grp1	-0.13119	Hepatocellular Carcinoma	HCC	MALE	46	ASIAN	Cirrhosis/Fibrosis	Stage II	G1/G2	None	T2	HBV.pos	7.05528	1	4.46575	0	5	0.105815	-0.411365	16	HRD Low	p53 mut	0.457399	p53 mutant	L2	L1+L2	0.0092673	-0.0161093	0.408538
TCGA-DD-AAVV-01A-11R-A41C-07	Grp1	-0.0762247	Hepatocellular Carcinoma	HCC	MALE	56	ASIAN	Cirrhosis/Fibrosis	Stage II	G3/G4	None	T2	HBV.pos	12.9168	0	5	0	5	-0.103268	0.279074	29	HRD High	p53 mut	-0.151547	WT	L2	L1+L2	-0.137931	-0.136839	0.160103
TCGA-DD-AAVW-01A-11R-A41C-07	Grp1	-0.174268	Hepatocellular Carcinoma	HCC	MALE	35	ASIAN	Cirrhosis/Fibrosis	Stage I	G1/G2	Macro/Micro	T1	HBV.pos	10.5632	0	5	0	5	-0.442488	-0.212412	29	HRD High	WT	-0.473836	WT	L3	L3	-0.286041	-0.114193	-0.300495
TCGA-DD-AAVX-01A-11R-A41C-07	Grp1	-0.428822	Hepatocellular Carcinoma	HCC	MALE	38	ASIAN	Cirrhosis/Fibrosis	Stage II	G1/G2	None	T2	HBV.neg	0	1	1.07671	0	4.70685	-2.18307	-0.327249	8	HRD Low	WT	-0.489637	WT	L1	L1+L2	0.211686	0.00666044	0.0873606
TCGA-DD-AAVY-01A-11R-A41C-07	Grp1	-0.453372	Hepatocellular Carcinoma	HCC	MALE	56	ASIAN	No	Stage III/IV	G1/G2	None	T3/T4	HBV.neg	0	0	5	0	5	-3.62844	-0.241925	10	HRD Low	WT	-0.450968	WT	L1	L1+L2	-0.111868	-0.201283	-0.0707587
TCGA-DD-AAVZ-01A-11R-A41C-07	Grp1	0.0142174	Hepatocellular Carcinoma	HCC	MALE	38	ASIAN	Cirrhosis/Fibrosis	Stage I	G1/G2	Macro/Micro	T1	HBV.pos	1.58496	0	5	0	5	-0.0932091	-0.173019	17	HRD Low	WT	-0.130825	WT	L3	L3	-0.141608	-0.095327	0.130842
TCGA-DD-AAW0-01A-11R-A41C-07	Grp1	-0.136931	Hepatocellular Carcinoma	HCC	MALE	54	ASIAN	Cirrhosis/Fibrosis	Stage I	G1/G2	None	T1	HBV.pos	5.61471	0	5	0	5	-1.13304	-0.359565	23	HRD High	WT	-0.643223	WT	L3	L3	0.114504	0.133086	-0.251199
TCGA-DD-AAW1-01A-11R-A41C-07	Grp1	-0.443078	Hepatocellular Carcinoma	HCC	MALE	55	ASIAN	Cirrhosis/Fibrosis	Stage III/IV	G1/G2	None	T3/T4	HBV.neg	0	0	5	0	5	-3.47864	-0.971424	5	HRD Low	WT	-0.522032	WT	L1	L1+L2	0.0751288	-0.113712	-0.229346
TCGA-DD-AAW2-01A-11R-A41C-07	Grp1	-0.355837	Hepatocellular Carcinoma	HCC	MALE	69	ASIAN	Cirrhosis/Fibrosis	Stage I	G1/G2	None	T1	HBV.neg	0	1	1.07123	0	5	-1.40359	-0.443459	8	HRD Low	WT	-0.265103	WT	L1	L1+L2	-0.200472	-0.288106	-0.0940252
TCGA-DD-AAW3-01A-11R-A41C-07	Grp1	-0.251025	Hepatocellular Carcinoma	HCC	MALE	69	ASIAN	No	Stage I	G1/G2	None	T1	HBV.neg	0	0	4.47397	0	4.47397	-2.00116	-0.425212	13	HRD Low	WT	-0.492661	WT	L1	L1+L2	-0.0265523	-0.158334	-0.0986869
TCGA-ED-A459-01A-11R-A266-07	Grp2	0.120953	Hepatocellular Carcinoma	HCC	MALE	47	ASIAN		Stage II	G1/G2		T2	HBV.neg	0	0	2.49315	0	2.49315	1.37265	0.870594	42	HRD High	p53 mut	0.525029	p53 mutant	2	2	-0.153069	0.00741763	0.096541
TCGA-ED-A4XI-01A-11R-A266-07	Grp1	-0.290875	Hepatocellular Carcinoma	HCC	MALE	58	ASIAN		Stage II	G3/G4	Macro/Micro	T2	HBV.neg	0	0	2.24384	0	2.24384	-1.89378	-0.744008	12	HRD Low	WT	-0.740346	WT	L1	L1+L2	-0.0836153	0.304165	-0.329472
TCGA-ED-A5KG-01A-11R-A27V-07	Grp2	0.439717	Hepatocellular Carcinoma	Blast_Like	FEMALE	60	ASIAN		Stage II	G1/G2	None	T2	HBV.pos	4.08746	0	2.33973	0	2.33973	0.548178	-0.359115	0	HRD Low	WT	-0.276628	WT	2	2	-0.671358	-1.13764	-0.00301859
TCGA-ED-A627-01A-12R-A311-07	Grp1	-0.260283	Hepatocellular Carcinoma	CCA_Like	MALE	74	WHITE		Stage I	G1/G2	Macro/Micro	T1	HBV.neg	0	0	1.1589	0	1.1589	-1.56492	-0.0297087	0	HRD Low	WT	-0.783732	WT	L1	L1+L2	0.0471427	0.0475368	-0.19829
TCGA-ED-A66X-01A-11R-A311-07	Grp2	0.144542	Hepatocellular Carcinoma	CCA_Like	MALE	35	ASIAN		Stage III/IV	G3/G4	None	T3/T4	HBV.neg	0	1	0.339726	0	1.11233	0.558318	-0.101641	12	HRD Low	WT	0.0921019	p53 mutant	2	2	-0.346279	-0.42288	0.0857379
TCGA-ED-A66Y-01A-11R-A311-07	Grp2	0.491952	Hepatocellular Carcinoma	Blast_Like	FEMALE	51	ASIAN		Stage III/IV	G3/G4	None	T3/T4	HBV.pos	5.72792	0	0.810959	1	0.810959	0.402118	0.16716	15	HRD Low	WT	0.271393	p53 mutant	2	2	-0.678562	-0.729369	0.0275009
TCGA-ED-A7PX-01A-51R-A352-07	Grp2	0.282099	Hepatocellular Carcinoma	CCA_Like	FEMALE	48	ASIAN		Stage II	G3/G4	None	T2	HBV.pos	3.70044	0	0.0164384	0	0.0164384	0.42347	0.30249	36	HRD High	WT	-0.0847673	WT	2	2	-0.296984	-0.787928	0.237059
TCGA-ED-A7PY-01A-11R-A33R-07	Grp1	0.00468603	Hepatocellular Carcinoma	HCC	FEMALE	20	ASIAN		Stage II	G3/G4	None	T2	HBV.neg	0	0	1.06849	0	1.06849	0.273959	-0.868435	18	HRD Low	WT	-0.167535	WT	L2	L1+L2	-0.260308	-0.178749	-0.158216
TCGA-ED-A7PZ-01A-11R-A33R-07	Grp2	0.115103	Hepatocellular Carcinoma	HCC	MALE	61	ASIAN		Stage II	G1/G2	Macro/Micro	T2	HBV.pos	5.83289	0	0.0164384	0	0.0164384	1.31687	-0.312218	25	HRD High	p53 mut	0.527971	p53 mutant	2	2	0.23206	-0.00218668	0.382773
TCGA-ED-A7XO-01A-11R-A352-07	Grp2	0.396159	Hepatocellular Carcinoma	HCC	MALE	29	ASIAN		Stage III/IV	G1/G2	None	T3/T4	HBV.pos	14.1248	1	0.717808	0	1.16986	1.25128	-0.0625203	25	HRD High	p53 mut	0.474447	p53 mutant	2	2	-0.0154956	0.149326	0.121341
TCGA-ED-A7XP-01A-11R-A352-07	Grp1	0.030786	Hepatocellular Carcinoma	HCC	FEMALE	53	ASIAN		Stage II	G3/G4	None	T2	HBV.pos	16.6993	1	0.512329	0	1.09589	-0.228919	-0.566502	27	HRD High	p53 mut	-0.0310037	WT	L3	L3	-0.155668	-0.428859	0.00529906
TCGA-ED-A82E-01A-11R-A352-07	Grp1	-0.064233	Hepatocellular Carcinoma	CCA_Like	FEMALE	60	ASIAN		Stage III/IV	G1/G2	Macro/Micro	T3/T4	HBV.pos	5.42626	0	1.11781	0	1.11781	-2.53293	-0.674774	29	HRD High	WT	-0.573115	WT	L1	L1+L2	-0.24788	-1.15362	0.017716
TCGA-ED-A8O5-01A-11R-A36F-07	Grp1	0.0821057	Hepatocellular Carcinoma	HCC	FEMALE	59	ASIAN		Stage III/IV	G3/G4	None	T3/T4	HBV.neg	0	0	1.11233	0	1.11233	0.199002	-0.308254	14	HRD Low	WT	-0.0442139	WT	L3	L3	-0.261835	-0.374881	0.015209
TCGA-ED-A8O6-01A-11R-A36F-07	Grp1	0.074852	Hepatocellular Carcinoma	Blast_Like	FEMALE	50	ASIAN		Stage III/IV	G3/G4	None	T3/T4	HBV.pos	17.2138	0	0.153425	1	0.153425	0.773442	0.223122	23	HRD High	WT	0.213875	p53 mutant	L3	L3	-0.290358	-0.383005	0.120871
TCGA-ED-A97K-01A-21R-A38B-07	Grp2	0.204854	Hepatocholangiocarcinoma (Mixed)	CCA_Like	MALE	54	ASIAN		Stage III/IV	G1/G2	None	T3/T4	HBV.neg	0	0	0.0164384	0	0.0164384	-0.449549	-0.0289283	46	HRD High	WT	-0.482704	WT	2	2	-0.640129	-0.683517	-0.292224
TCGA-EP-A12J-01A-11R-A131-07	Grp1	-0.110342	Hepatocellular Carcinoma	HCC	MALE	62	BLACK		Stage I	G1/G2	Macro/Micro	T1	HBV.neg	0	0	1.56164	0	1.56164	-1.10376	-0.595091	9	HRD Low	WT	-0.248761	WT	L1	L1+L2	0.0127874	0.0455718	-0.303929
TCGA-EP-A26S-01A-11R-A16W-07	Grp1	-0.127027	Hepatocellular Carcinoma	HCC	MALE	70	WHITE	No	Stage I	G1/G2	Macro/Micro	T1	HBV.neg	0	0	1.66575	0	1.66575	-1.32063	-1.07544	5	HRD Low	WT	-0.500306	WT	L1	L1+L2	0.113538	0.0494443	-0.00892007
TCGA-EP-A2KA-01A-11R-A180-07	Grp2	0.415077	Hepatocellular Carcinoma	Blast_Like	FEMALE	52	WHITE	Cirrhosis/Fibrosis	Stage III/IV	G3/G4	Macro/Micro	T3/T4	HBV.pos	1.58496	1	0.80274	1	1.71781	0.853979	0.378423	14	HRD Low	WT	0.501493	p53 mutant	2	2	-0.154797	-0.294876	0.205462
TCGA-EP-A2KB-01A-11R-A180-07	Grp2	0.113429	Hepatocellular Carcinoma	HCC	FEMALE	46	WHITE		Stage I	G1/G2	None	T1	HBV.neg	0	1	0.441096	1	1.63288	0.277129	-0.245341	5	HRD Low	WT	0.493086	p53 mutant	2	2	-0.323676	-0.331049	0.0539332
TCGA-EP-A2KC-01A-11R-A213-07	Grp1	-0.1193	Hepatocellular Carcinoma	HCC	MALE	62	BLACK		Stage I	G3/G4	None	T1	HBV.pos	2.32193	0	0.0520548	1	0.0520548	-0.502956	-0.226515	5	HRD Low	WT	-0.120984	WT	L3	L3	-0.112155	-0.114996	-0.0931166
TCGA-EP-A3JL-01A-11R-A213-07	Grp1	-0.0338712	Hepatocellular Carcinoma	HCC	MALE	76	WHITE		Stage I	G1/G2	Macro/Micro	T1	HBV.neg	0	0	0.830137	0	0.830137	0.34041	0.247673	6	HRD Low	WT	0.247931	p53 mutant	L2	L1+L2	0.10833	0.0932066	0.261172
TCGA-EP-A3RK-01A-11R-A22L-07	Grp2	0.268239	Hepatocellular Carcinoma	HCC	MALE	73	WHITE	Cirrhosis/Fibrosis	Stage III/IV	G1/G2	None	T3/T4	HBV.neg	0	1	0.876712	0	0.994521	0.641172	0.36335	17	HRD Low	WT	0.174382	p53 mutant	2	2	-0.0267655	0.00250975	0.281024
TCGA-ES-A2HS-01A-11R-A180-07	Grp1	-0.566162	Hepatocellular Carcinoma	HCC	MALE	80	WHITE	No	Stage I	G1/G2	Macro/Micro	T1	HBV.neg	0	0	1.88493	1	1.88493	-0.622379	0.526803	9	HRD Low	WT	-0.149057	WT	L2	L1+L2	0.0222421	0.165343	-0.0887893
TCGA-ES-A2HT-01A-12R-A180-07	Grp1	-0.897724	Hepatocellular Carcinoma	HCC	MALE	54	BLACK	No	Stage I	G1/G2		T1	HBV.neg	0	0	1.2	1	1.2	-1.92566	-0.242031	3	HRD Low	WT	-0.469019	WT	L1	L1+L2	0.350689	0.283003	0.165595
TCGA-FV-A23B-01A-11R-A16W-07	Grp2	0.199136	Hepatocellular Carcinoma	HCC	FEMALE	70	WHITE		Stage II		None	T2	HBV.neg	0	1	3.98082	0	5	0.286664	0.0533909	19	HRD Low	WT	0.00907085	p53 mutant	2	2	-0.327253	-0.453348	-0.0762815
TCGA-FV-A2QQ-01A-11R-A22L-07	Grp1	-0.228393	Hepatocellular Carcinoma	HCC	MALE	80	WHITE		Stage I	G1/G2	None	T1	HBV.neg	0	0	1.99726	0	1.99726	-0.780984	-1.08326	12	HRD Low	WT	-0.357147	WT	L3	L3	0.232864	0.327183	0.150833
TCGA-FV-A2QR-01A-11R-A213-07	Grp1	-0.277191	Hepatocellular Carcinoma	HCC	MALE	75	WHITE		Stage I	G1/G2	None	T1	HBV.neg	0	1	1.53699	1	1.59178	-0.537494	0.65416	27	HRD High	WT	-0.403841	WT	L3	L3	0.0920485	0.00516433	-0.217109
TCGA-FV-A3I0-01A-11R-A22L-07	Grp1	-0.262275	Hepatocholangiocarcinoma (Mixed)	CCA_Like	FEMALE	76	WHITE		Stage II	G1/G2		T2	HBV.neg	0	1	0.435616	0	2.32329	-1.11497	-0.113541	30	HRD High	WT	-0.404987	WT	L1	L1+L2	-0.479303	-1.3395	0.0767766
TCGA-FV-A3I1-01A-11R-A22L-07	Grp1	-0.0826128	Hepatocellular Carcinoma	HCC	FEMALE	81	WHITE	No	Stage II	G1/G2		T2	HBV.neg	0	0	0.676712	1	0.676712	-0.0500021	-0.278366	15	HRD Low	p53 mut	0.371814	p53 mutant	L3	L3	-0.00509432	0.121709	-0.066061
TCGA-FV-A3R2-01A-11R-A22L-07	Grp1	-0.0488839	Hepatocellular Carcinoma	HCC	MALE	75	WHITE		Stage I		None	T1	HBV.neg	0	0	0.531507	1	0.531507	0.132262	0.0367056	12	HRD Low	p53 mut	0.409072	p53 mutant	L3	L3	-0.0431424	0.0092021	-0.137704
TCGA-FV-A3R3-01A-11R-A22L-07	Grp1	-0.417009	Hepatocellular Carcinoma	HCC	FEMALE	38	WHITE		Stage I	G1/G2	None	T1	HBV.neg	0	0	1.00274	1	1.00274	-1.98433	-0.411671	7	HRD Low	WT	-0.694052	WT	L1	L1+L2	0.18029	0.112479	-0.389232
TCGA-FV-A495-01A-11R-A266-07	Grp1	0.0489424	Hepatocellular Carcinoma	HCC	FEMALE	51	WHITE	Cirrhosis/Fibrosis	Stage II	G1/G2	None	T2	HBV.neg	0	0	0.00273973	0	0.00273973	0.74355	0.0191452	20	HRD High	WT	0.399019	p53 mutant	L2	L1+L2	0.0109805	-0.0643255	0.347318
TCGA-FV-A496-01A-11R-A266-07	Grp1	-0.166005	Hepatocellular Carcinoma	HCC	FEMALE	84	WHITE	No	Stage I	G1/G2	Macro/Micro	T1	HBV.neg	0	0	0.0273973	0	0.0273973	-1.24318	-0.00133538	43	HRD High	p53 mut	0.0179039	p53 mutant	L3	L3	0.0809049	0.050417	-0.0693201
TCGA-FV-A4ZP-01A-12R-A266-07	Grp1	-0.27591	Hepatocellular Carcinoma	Blast_Like	MALE	78	WHITE		Stage III/IV	G1/G2	None	T3/T4	HBV.neg	0	0	5	0	5	2.38795	0.411801	18	HRD Low	p53 mut	0.556909	p53 mutant	L2	L1+L2	-0.318961	-0.588233	0.479425
TCGA-FV-A4ZQ-01A-11R-A266-07	Grp2	0.461521	Hepatocellular Carcinoma	Blast_Like	MALE	52	WHITE		Stage I	G1/G2		T1	HBV.neg	0	0	0.0328767	0	0.0328767	1.50925	0.715823	15	HRD Low	p53 mut	0.487193	p53 mutant	2	2	-0.243288	-0.449159	0.458271
TCGA-G3-A25S-01A-11R-A16W-07	Grp2	0.156594	Hepatocellular Carcinoma	HCC	MALE	64	WHITE	Cirrhosis/Fibrosis	Stage I	G1/G2	None	T1	HBV.neg	0	1	0.10137	1	1.13973	0.930818	0.147338	26	HRD High	WT	0.181007	p53 mutant	2	2	0.0328778	-0.106537	0.352351
TCGA-G3-A25T-01A-11R-A16W-07	Grp1	0.0952688	Hepatocellular Carcinoma	CCA_Like	FEMALE	45	WHITE	No	Stage III/IV	G1/G2	None	T3/T4	HBV.pos	5.78136	1	1.23836	0	4.25479	1.02084	0.782878	13	HRD Low	WT	-0.0509433	WT	L2	L1+L2	-0.159448	-0.795159	0.450103
TCGA-G3-A25U-01A-11R-A16W-07	Grp2	0.370467	Hepatocellular Carcinoma	HCC	FEMALE	63	ASIAN	No	Stage I	G3/G4	Macro/Micro	T1	HBV.pos	17.4204	0	4.48219	0	4.48219	0.532443	0.0716921	19	HRD Low	p53 mut	0.437466	p53 mutant	2	2	0.180592	0.100402	0.106955
TCGA-G3-A25V-01A-11R-A16W-07	Grp1	-0.299926	Hepatocellular Carcinoma	HCC	MALE	68	WHITE	Cirrhosis/Fibrosis	Stage I	G1/G2	None	T1	HBV.neg	0	1	1.33973	0	2.35616	-1.47267	-0.145566	1	HRD Low	p53 mut	-0.617555	WT	L3	L3	0.138659	0.446647	-0.00113931
TCGA-G3-A25X-01A-11R-A16W-07	Grp2	0.340681	Hepatocellular Carcinoma	CCA_Like	MALE	73	ASIAN	Cirrhosis/Fibrosis	Stage II	G3/G4	None	T2	HBV.pos	2.32193	0	4.87397	0	4.87397	1.35445	1.22113			WT	0.358172	p53 mutant	2	2	-0.365545	-0.792064	0.486551
TCGA-G3-A25Y-01A-11R-A16W-07	Grp2	0.48664	Hepatocellular Carcinoma	CCA_Like	FEMALE	52	ASIAN	Cirrhosis/Fibrosis	Stage I	G3/G4	Macro/Micro	T1	HBV.pos	5.35755	1	0.972603	1	1.23836	0.804496	0.400105	32	HRD High	WT	0.129072	p53 mutant	2	2	-0.206033	-0.300479	0.299666
TCGA-G3-A25Z-01A-11R-A16W-07	Grp1	-0.226265	Hepatocellular Carcinoma	HCC	MALE	58	ASIAN	Cirrhosis/Fibrosis	Stage I	G1/G2	Macro/Micro	T1	HBV.pos	13.8647	0	1.79452	0	1.79452	-0.479426	-0.463968	12	HRD Low	p53 mut	0.0885908	p53 mutant	L3	L3	0.2315	0.247006	0.215293
TCGA-G3-A3CG-01A-11R-A213-07	Grp1	-0.440969	Hepatocellular Carcinoma	HCC	MALE	80	WHITE	Cirrhosis/Fibrosis	Stage I	G1/G2	None	T1		0	1	0.90137	0	1.84384	-1.54551	-0.11283			WT	-0.466087	WT	L1	L1+L2	0.184882	0.273065	-0.124479
TCGA-G3-A3CH-01A-11R-A22L-07	Grp2	0.153605	Hepatocellular Carcinoma	HCC	MALE	53	ASIAN	Cirrhosis/Fibrosis	Stage III/IV	G1/G2	None	T3/T4	HBV.pos	5.35755	1	0.317808	0	2.13699	-0.52216	0.512426	12	HRD Low	WT	-0.0003994	WT	2	2	0.0345169	0.432102	-0.0926243
TCGA-G3-A3CI-01A-11R-A213-07	Grp1	-0.355321	Hepatocellular Carcinoma	HCC	MALE	71	WHITE	No	Stage I	G1/G2	None	T1	HBV.neg	0	0	0.493151	0	0.493151	-2.09356	-0.27917	2	HRD Low	WT	-0.678377	WT	L1	L1+L2	0.404903	0.791964	-0.36519
TCGA-G3-A3CJ-01A-11R-A213-07	Grp1	-0.64522	Hepatocellular Carcinoma	HCC	MALE	52		Cirrhosis/Fibrosis	Stage II	G1/G2	None	T2	HBV.pos	12.4181	1	0.810959	0	1.6274	-2.56277	-0.270148			WT	-0.361295	WT	L1	L1+L2	0.135468	0.194642	0.179281
TCGA-G3-A3CK-01A-11R-A213-07	Grp1	-0.223312	Hepatocellular Carcinoma	HCC	MALE	61	ASIAN	Cirrhosis/Fibrosis	Stage I	G1/G2	None	T1	HBV.pos	17.4713	0	1.60274	0	1.60274	-1.39672	-0.662551	4	HRD Low	WT	-0.629355	WT	L1	L1+L2	0.0646952	0.098878	0.083023
TCGA-G3-A5SI-01A-31R-A27V-07	Grp2	0.337778	Hepatocellular Carcinoma	HCC	MALE	44	ASIAN	Cirrhosis/Fibrosis	Stage II	G1/G2		T2	HBV.neg	0	1	0.953425	1	2.10411	1.41454	-0.175037	32	HRD High	WT	0.593741	p53 mutant	2	2	0.0345775	-0.178943	0.221786
TCGA-G3-A5SJ-01A-11R-A27V-07	Grp2	0.247998	Hepatocellular Carcinoma	CCA_Like	MALE	59	WHITE	Cirrhosis/Fibrosis	Stage I	G1/G2	Macro/Micro	T1	HBV.neg	0	1	0.843836	0	1.91233	0.566684	-0.0800346	12	HRD Low	p53 mut	0.0381869	p53 mutant	2	2	-0.327047	-0.434471	0.269893
TCGA-G3-A5SK-01A-11R-A27V-07	Grp1	-0.532229	Hepatocellular Carcinoma	HCC	MALE	58	WHITE	Cirrhosis/Fibrosis	Stage I	G1/G2		T1	HBV.neg	0	1	1.32329	0	2.03836	-2.62047	0.0660246			WT	-0.669631	WT	L1	L1+L2	0.131577	0.363007	-0.209108
TCGA-G3-A5SL-01A-11R-A27V-07	Grp1	-0.413645	Hepatocellular Carcinoma	HCC	MALE	70	WHITE	No	Stage II	G1/G2	Macro/Micro	T2	HBV.neg	0	0	1.70137	0	1.70137	-1.15458	-0.157299	7	HRD Low	WT	-0.308557	WT	L1	L1+L2	0.416045	0.219675	0.0878873
TCGA-G3-A5SM-01A-12R-A28V-07	Grp1	-0.182341	Hepatocellular Carcinoma	HCC	MALE	58	WHITE	Cirrhosis/Fibrosis	Stage II	G3/G4	None	T2	HBV.neg	0	1	0.690411	0	1.42466	-0.0557539	0.228659	9	HRD Low	p53 mut	0.139655	p53 mutant	L3	L3	0.0780351	0.383575	-0.0699706
TCGA-G3-A6UC-01A-21R-A33J-07	Grp1	-0.301949	Hepatocellular Carcinoma	HCC	MALE	65	WHITE	Cirrhosis/Fibrosis	Stage III/IV	G1/G2	None	T3/T4	HBV.neg	0	1	1.75068	0	1.83836	-1.66524	-1.1808	9	HRD Low	WT	-0.452206	WT	L1	L1+L2	0.0122678	-0.0431634	-0.232445
TCGA-G3-A7M5-01A-11R-A33R-07	Grp1	-0.125471	Hepatocellular Carcinoma	HCC	MALE	76	ASIAN	No	Stage I	G1/G2	Macro/Micro	T1	HBV.neg	0	0	1.22466	0	1.22466	-1.46206	-0.561999	6	HRD Low	WT	-0.431509	WT	L3	L3	-5.34827e-05	0.333668	0.0382846
TCGA-G3-A7M6-01A-11R-A33R-07	Grp2	0.279732	Hepatocellular Carcinoma	CCA_Like	FEMALE	60	WHITE	Cirrhosis/Fibrosis	Stage I	G3/G4		T1	HBV.neg	0	1	0.80274	0	1.73151	-0.127989	0.239773	21	HRD High	p53 mut	0.0221588	p53 mutant	2	2	-0.586458	-0.88066	-0.0487686
TCGA-G3-A7M7-01A-12R-A352-07	Grp1	-0.597311	Hepatocellular Carcinoma	HCC	MALE	65	WHITE	Cirrhosis/Fibrosis	Stage I	G1/G2		T1	HBV.neg	0	0	0.989041	0	0.989041	-2.27181	-0.299437	3	HRD Low	WT	-0.532071	WT	L1	L1+L2	0.349838	0.269306	0.172944
TCGA-G3-A7M8-01A-11R-A33R-07	Grp1	-0.169423	Hepatocellular Carcinoma	HCC	MALE	31	ASIAN	Cirrhosis/Fibrosis	Stage I	G1/G2		T1	HBV.neg	0	0	1.17808	0	1.17808	-2.40654	0.0576706	0	HRD Low	WT	-0.621477	WT	L1	L1+L2	0.262899	0.773054	-0.24637
TCGA-G3-A7M9-01A-23R-A352-07	Grp2	1.02802	Hepatocellular Carcinoma	Blast_Like	MALE	70	WHITE	Cirrhosis/Fibrosis	Stage III/IV	G1/G2	None	T3/T4	HBV.neg	0	0	0.153425	1	0.153425	2.22163	0.181571	31	HRD High	p53 mut	0.542913	p53 mutant	2	2	-0.275249	-0.599115	0.749344
TCGA-G3-AAUZ-01A-11R-A38B-07	Grp1	0.0416852	Hepatocellular Carcinoma	HCC	MALE	48		Cirrhosis/Fibrosis	Stage I	G1/G2		T1	HBV.neg	0	0	1.31507	0	1.31507	0.784167	-0.0330844	13	HRD Low	WT	0.311236	p53 mutant	L2	L1+L2	0.0602781	0.225738	0.100672
TCGA-G3-AAV0-01A-11R-A37K-07	Grp1	-0.567902	Hepatocellular Carcinoma	HCC	MALE	58	ASIAN	No	Stage I	G1/G2	None	T1	HBV.pos	16.5415	0	1.30411	0	1.30411	-0.54358	0.0780089	16	HRD Low	WT	-0.316923	WT	L2	L1+L2	0.190843	-0.00121458	-0.0960338
TCGA-G3-AAV1-01A-11R-A38B-07	Grp1	0.0458966	Hepatocellular Carcinoma	HCC	MALE	51	ASIAN	Cirrhosis/Fibrosis	Stage III/IV	G3/G4	None	T3/T4	HBV.pos	11.6702	1	0.134247	1	0.983562	-0.611466	-0.141606	27	HRD High	WT	-0.251109	WT	L3	L3	0.0917099	0.104638	0.064385
TCGA-G3-AAV2-01A-11R-A37K-07	Grp1	-0.466749	Hepatocellular Carcinoma	HCC	MALE	50	WHITE	Cirrhosis/Fibrosis	Stage I	G1/G2		T1	HBV.neg	0	0	1.01918	0	1.01918	-2.93019	-1.45038	13	HRD Low	WT	-0.510655	WT	L1	L1+L2	0.0977449	0.0456716	-0.0797995
TCGA-G3-AAV3-01A-11R-A37K-07	Grp2	0.135009	Hepatocellular Carcinoma	HCC	FEMALE	58	WHITE	Cirrhosis/Fibrosis	Stage II	G1/G2	Macro/Micro	T2	HBV.neg	0	0	1.12877	0	1.12877	0.287517	0.0614411	8	HRD Low	WT	-0.229683	WT	2	2	-0.109601	-0.0158748	0.0714653
TCGA-G3-AAV4-01A-11R-A38B-07	Grp1	-0.029556	Hepatocellular Carcinoma	HCC	FEMALE	83	WHITE	Cirrhosis/Fibrosis	Stage I	G1/G2	None	T1	HBV.neg	0	0	0.0739726	1	0.0739726	-0.374558	-0.225947	12	HRD Low	p53 mut	-0.187567	WT	L1	L1+L2	0.0628849	0.0131429	0.139741
TCGA-G3-AAV5-01A-11R-A37K-07	Grp1	-0.0279831	Hepatocellular Carcinoma	Blast_Like	MALE	67	WHITE	Cirrhosis/Fibrosis	Stage II	G1/G2		T2	HBV.neg	0	1	0.320548	0	0.969863	-0.176075	-0.431845	7	HRD Low	WT	0.247132	p53 mutant	L2	L1+L2	0.0941216	-0.00658311	0.33755
TCGA-G3-AAV6-01A-21R-A37K-07	Grp2	0.597297	Hepatocellular Carcinoma	Blast_Like	FEMALE	53	WHITE	No	Stage III/IV	G3/G4	Macro/Micro	T3/T4	HBV.neg	0	1	0.120548	1	0.178082	1.69751	0.522546	29	HRD High	WT	0.403079	p53 mutant	2	2	-0.350191	-0.279575	0.473537
TCGA-G3-AAV7-01A-11R-A38B-07	Grp2	0.599258	Hepatocellular Carcinoma	Blast_Like	MALE	38	ASIAN	Cirrhosis/Fibrosis	Stage II	G1/G2	Macro/Micro	T2	HBV.pos	9.24079	0	0.989041	0	0.989041	1.78533	0.564869	23	HRD High	p53 mut	0.658907	p53 mutant	2	2	-0.311695	-0.627693	0.244803
TCGA-GJ-A3OU-01A-31R-A38B-07	Grp1	-0.0203388	Hepatocellular Carcinoma	HCC	MALE	59	WHITE		Stage I	G1/G2		T1	HBV.neg	0	1	2.40822	0	2.40822	0.243155	-0.0139236	15	HRD Low	p53 mut	-0.0667149	WT	L3	L3	-0.126949	-0.425559	-0.0355296
TCGA-GJ-A6C0-01A-12R-A311-07	Grp2	0.352473	Hepatocellular Carcinoma	HCC	FEMALE	75	WHITE		Stage II	G1/G2	None	T2	HBV.neg	0	0	0.0849315	1	0.0849315	1.33584	0.147547	23	HRD High	WT	0.312396	p53 mutant	2	2	0.0483087	-0.253781	-0.00507075
TCGA-GJ-A9DB-01A-11R-A37K-07	Grp2	0.141466	Hepatocellular Carcinoma	HCC	MALE	68	WHITE		Stage I	G1/G2	None	T1	HBV.neg	0	0	0.183562	1	0.183562	-0.288949	0.139643	9	HRD Low	WT	-0.223098	WT	2	2	-0.0415522	0.299312	-0.242816
TCGA-HP-A5MZ-01A-21R-A27V-07	Grp1	-0.341843	Hepatocellular Carcinoma	HCC	MALE	78			Stage I	G1/G2	None	T1	HBV.neg	0	0	0.249315	1	0.249315	-0.758126	-0.0204352	2	HRD Low	WT	-0.598081	WT	L3	L3	0.135257	0.449665	-0.0483265
TCGA-HP-A5N0-01A-11R-A28V-07	Grp1	-0.263744	Hepatocellular Carcinoma	HCC	FEMALE	90		No			None		HBV.neg	0	1	0.490411	1	3.14247	-2.78142	-0.644617	19	HRD Low	WT	-0.69882	WT	L1	L1+L2	0.120653	0.273157	-0.33526
TCGA-K7-A5RF-01A-11R-A28V-07	Grp1	-0.355979	Hepatocellular Carcinoma	HCC	MALE	64	WHITE		Stage I	G1/G2		T1	HBV.neg	0	1	0.561644	0	1.72877	-3.11322	-0.194192			WT	-0.713562	WT	L1	L1+L2	0.251474	0.660974	-0.310611
TCGA-K7-A5RG-01A-11R-A28V-07	Grp2	0.519599	Hepatocellular Carcinoma	HCC	MALE	66	BLACK		Stage I	G1/G2		T1	HBV.neg	0	0	1.42192	0	1.42192	0.973829	0.464544	6	HRD Low	p53 mut	0.0563773	p53 mutant	2	2	-0.339163	-0.240984	0.00864963
TCGA-K7-A6G5-01A-11R-A311-07	Grp1	-0.479509	Hepatocellular Carcinoma	HCC	MALE	66	WHITE		Stage I	G1/G2	Macro/Micro	T1	HBV.neg	0	0	1.40274	0	1.40274	-0.565739	-0.0399147	5	HRD Low	WT	-0.29074	WT	L2	L1+L2	0.328817	0.530872	-0.063022
TCGA-K7-AAU7-01A-11R-A38B-07	Grp2	0.206302	Hepatocholangiocarcinoma (Mixed)	CCA_Like	MALE	61	WHITE		Stage II	G1/G2	Macro/Micro	T2	HBV.neg	0	1	0.158904	0	0.983562	0.52892	0.3325	11	HRD Low	p53 mut	-0.0851659	WT	2	2	-0.447474	-0.765552	0.0491155
TCGA-KR-A7K0-01A-12R-A33R-07	Grp1	-0.224972	Hepatocellular Carcinoma	HCC	MALE	65	WHITE		Stage I	G1/G2	Macro/Micro	T1	HBV.neg	0	0	0.178082	1	0.178082	-0.449932	-0.390472	4	HRD Low	WT	-0.576535	WT	L1	L1+L2	0.173808	0.0599756	0.0481443
TCGA-KR-A7K2-01A-12R-A33R-07	Grp1	-0.314441	Hepatocholangiocarcinoma (Mixed)	HCC	MALE	64	WHITE		Stage I	G1/G2		T1	HBV.neg	0	0	2.27123	0	2.27123	-0.763969	0.230401	9	HRD Low	WT	-0.189199	WT	L2	L1+L2	-0.212748	-0.183862	-0.045825
TCGA-KR-A7K7-01A-11R-A33J-07	Grp2	0.184266	Hepatocellular Carcinoma	Blast_Like	FEMALE	61	WHITE		Stage II	G1/G2	None	T2	HBV.neg	0	1	0.654795	0	2.60548	0.990569	0.551061	4	HRD Low	WT	0.415504	p53 mutant	2	2	-0.0779671	-0.341599	0.629232
TCGA-KR-A7K8-01A-11R-A33J-07	Grp1	0.0809126	Hepatocellular Carcinoma	HCC	MALE	57			Stage I	G1/G2	None	T1	HBV.neg	0	0	2.48219	0	2.48219	0.081162	0.689954	24	HRD High	WT	0.0143487	p53 mutant	L2	L1+L2	0.0201939	-0.250855	-0.176968
TCGA-LG-A6GG-01A-11R-A311-07	Grp1	0.00213774	Hepatocellular Carcinoma	HCC	FEMALE	79	WHITE		Stage II	G1/G2	Macro/Micro	T2	HBV.neg	0	0	1.06027	0	1.06027	-0.0185209	0.413679	16	HRD Low	WT	-0.183014	WT	L3	L3	0.131631	0.0785517	-0.10953
TCGA-LG-A9QC-01A-11R-A37K-07	Grp1	-0.374811	Hepatocellular Carcinoma	HCC	MALE	48	WHITE		Stage I	G1/G2	Macro/Micro	T1	HBV.neg	0	0	1.16438	0	1.16438	-1.43592	-0.421337	13	HRD Low	WT	-0.325763	WT	L1	L1+L2	0.160209	-0.0799974	-0.108267
TCGA-LG-A9QD-01A-11R-A38B-07	Grp1	-0.400257	Hepatocellular Carcinoma	HCC	MALE	68	WHITE		Stage III/IV	G1/G2		T3/T4	HBV.neg	0	0	1.00274	0	1.00274	-2.88735	-0.744831	7	HRD Low	WT	-0.582854	WT	L1	L1+L2	0.215064	0.526287	-0.0270624
TCGA-MI-A75C-01A-11R-A32O-07	Grp1	0.0219933	Hepatocellular Carcinoma	HCC	MALE	64	WHITE		Stage I	G3/G4		T1	HBV.neg	0	0	0.79726	0	0.79726	-0.159038	-0.311216	10	HRD Low	WT	0.0980319	p53 mutant	L2	L1+L2	-0.00979055	-0.0516887	0.255462
TCGA-MI-A75E-01A-11R-A32O-07	Grp1	-0.211843	Hepatocellular Carcinoma	HCC	MALE	61	WHITE	Cirrhosis/Fibrosis	Stage III/IV	G1/G2	Macro/Micro	T3/T4	HBV.neg	0	0	1.38904	0	1.38904	-0.732586	0.0389762	6	HRD Low	WT	-0.506268	WT	L2	L1+L2	0.0164607	0.199526	-0.0484954
TCGA-MI-A75G-01A-11R-A32O-07	Grp1	-0.172081	Hepatocellular Carcinoma	HCC	MALE	63	WHITE	Cirrhosis/Fibrosis	Stage II	G1/G2	None	T2	HBV.neg	0	0	1.91233	0	1.91233	-1.38242	0.486895	10	HRD Low	p53 mut	-0.193148	WT	L3	L3	0.271926	0.294989	0.0823118
TCGA-MI-A75H-01A-11R-A32O-07	Grp1	-0.374008	Hepatocellular Carcinoma	HCC	MALE	77	WHITE	Cirrhosis/Fibrosis					HBV.neg	0	1	0.824658	0	2.04658	-0.727125	-0.373783	9	HRD Low	WT	-0.102771	WT	L1	L1+L2	0.166491	-0.00804623	0.165632
TCGA-MI-A75I-01A-11R-A32O-07	Grp1	0.0233588	Hepatocellular Carcinoma	HCC	MALE	61	BLACK			G1/G2		T2	HBV.neg	0	1	0.726027	0	1.72603	0.875972	0.597913	13	HRD Low	p53 mut	0.474347	p53 mutant	L3	L3	0.242052	0.0990086	0.0764818
TCGA-MR-A520-01A-11R-A266-07	Grp1	-0.359848	Hepatocellular Carcinoma	HCC	MALE	58	WHITE		Stage I	G1/G2	None	T1	HBV.neg	0	0	0.627397	0	0.627397	-2.47132	-0.527492	0	HRD Low	WT	-0.655001	WT	L1	L1+L2	0.508558	1.0768	-0.442976
TCGA-MR-A8JO-01A-12R-A36F-07	Grp1	-0.256767	Fibrolamellar Carcinoma	Blast_Like	MALE	34	WHITE		Stage I	G3/G4	Macro/Micro	T1	HBV.neg	0	0	0.90411	0	0.90411	-0.947548	0.0807142	11	HRD Low	WT	-0.533473	WT	L3	L3	-0.0991431	-0.55307	0.128935
TCGA-NI-A4U2-01A-11R-A28V-07	Grp1	-0.431258	Hepatocellular Carcinoma	HCC	MALE	71	WHITE	Cirrhosis/Fibrosis	Stage III/IV	G1/G2	Macro/Micro	T3/T4	HBV.neg	0	1	0.290411	1	4.90685	-1.76282	-0.0530337	17	HRD Low	WT	-0.514398	WT	L1	L1+L2	0.553111	0.417465	-0.0324018
TCGA-NI-A8LF-01A-11R-A36F-07	Grp1	-0.437824	Hepatocellular Carcinoma	HCC	MALE	74	WHITE		Stage I	G3/G4	Macro/Micro	T1	HBV.neg	0	0	2.18904	0	2.18904	-0.667092	0.256409	51	HRD High	p53 mut	-0.575015	WT	L1	L1+L2	0.405687	0.362396	-0.2562
TCGA-O8-A75V-01A-11R-A32O-07	Grp1	-0.250638	Hepatocellular Carcinoma	HCC	MALE	54		Cirrhosis/Fibrosis	Stage I	G1/G2	Macro/Micro	T1	HBV.neg	0	0	1.47397	0	1.47397	-0.503397	0.0906655	18	HRD Low	WT	-0.269589	WT	L2	L1+L2	-0.105083	0.149722	-0.0206711
TCGA-PD-A5DF-01A-11R-A27V-07	Grp2	0.197651	Hepatocellular Carcinoma	HCC	FEMALE	58	WHITE		Stage III/IV	G1/G2	Macro/Micro	T3/T4	HBV.neg	0	1	1.75068	1	1.75068	0.565862	0.182015	28	HRD High	WT	0.0769056	p53 mutant	2	2	0.1021	0.181681	0.163451
TCGA-QA-A7B7-01A-11R-A32O-07	Grp2	0.784014	Hepatocellular Carcinoma	Blast_Like	MALE	48	BLACK	No	Stage II	G1/G2	None	T2	HBV.pos	17.5275	1	0.241096	0	0.257534	2.10936	0.112679	23	HRD High	p53 mut	0.597894	p53 mutant	2	2	-0.224631	-0.47387	0.398749
TCGA-RC-A6M3-01A-11R-A32O-07	Grp2	0.710105	Hepatocellular Carcinoma	Blast_Like	MALE	24			Stage II	G3/G4	Macro/Micro	T2	HBV.pos	6.14975	0	0	0	0	1.36684	0.00143381	24	HRD High	WT	0.546637	p53 mutant	2	2	-0.17847	-0.726051	0.622345
TCGA-RC-A6M4-01A-11R-A32O-07	Grp1	-0.0631279	Hepatocellular Carcinoma	HCC	FEMALE	74	WHITE		Stage III/IV	G1/G2	None	T3/T4	HBV.neg	0	0	0.060274	0	0.060274	0.0812822	-0.472731	19	HRD Low	WT	0.35833	p53 mutant	L3	L3	0.202594	0.11346	0.199561
TCGA-RC-A6M5-01A-11R-A32O-07	Grp1	-0.594288	Fibrolamellar Carcinoma	HCC	FEMALE	20	WHITE		Stage III/IV	G1/G2	None	T1	HBV.neg	0	0	0.0410959	0	0.0410959	-2.99503	0.0551367	7	HRD Low	WT	-0.607188	WT	L1	L1+L2	0.262991	-0.0813386	-0.131786
TCGA-RC-A6M6-01A-11R-A32O-07	Grp2	0.545099	Hepatocellular Carcinoma	Blast_Like	MALE	75	WHITE		Stage II	G3/G4	None	T2	HBV.neg	0	0	0.0246575	0	0.0246575	1.40228	0.155075	42	HRD High	p53 mut	0.43823	p53 mutant	2	2	-0.154036	-0.444643	0.471346
TCGA-RC-A7S9-01A-11R-A33R-07	Grp2	0.496166	Hepatocellular Carcinoma	HCC	FEMALE	47	ASIAN	Cirrhosis/Fibrosis	Stage I	G3/G4	None	T1	HBV.pos	14.5192	0	1.75342	0	1.75342	1.13069	0.34739	19	HRD Low	WT	0.636823	p53 mutant	2	2	-0.117998	0.12813	0.167733
TCGA-RC-A7SB-01A-21R-A352-07	Grp2	0.179766	Hepatocellular Carcinoma	HCC	MALE	53	ASIAN	No	Stage II	G1/G2	Macro/Micro	T2	HBV.pos	15.1019	0	1.61096	0	1.61096	0.121243	0.0536658	19	HRD Low	p53 mut	0.210147	p53 mutant	2	2	0.00487765	0.342494	-0.0554098
TCGA-RC-A7SF-01A-11R-A352-07	Grp1	0.0226148	Hepatocellular Carcinoma	HCC	MALE	66	ASIAN	Cirrhosis/Fibrosis	Stage I	G1/G2		T1	HBV.pos	1.58496	1	1.37534	0	1.5863	0.44864	0.235243	13	HRD Low	WT	0.188626	p53 mutant	L2	L1+L2	-0.0948117	-0.0239242	-0.020212
TCGA-RC-A7SH-01A-11R-A38B-07	Grp1	0.036846	Hepatocellular Carcinoma	HCC	MALE	42	ASIAN	Cirrhosis/Fibrosis	Stage II	G3/G4	None	T2	HBV.pos	1.58496	1	0.249315	0	1.28219	0.394558	0.144776	26	HRD High	p53 mut	0.541959	p53 mutant	L2	L1+L2	-0.430311	-0.912278	-0.370262
TCGA-RC-A7SK-01A-11R-A352-07	Grp1	-0.117153	Hepatocellular Carcinoma	HCC	MALE	59	ASIAN	Cirrhosis/Fibrosis	Stage I	G3/G4		T1	HBV.pos	1.58496	1	0.854795	0	1.29315	-0.726921	0.245192	20	HRD High	p53 mut	0.167284	p53 mutant	L3	L3	0.091015	0.345092	-0.145637
TCGA-RG-A7D4-01A-12R-A33R-07	Grp2	0.577786	Hepatocellular Carcinoma	Blast_Like	MALE	69	BLACK		Stage II	G1/G2		T2	HBV.neg	0	0	3.00822	0	3.00822	1.28946	0.172373	29	HRD High	p53 mut	0.418007	p53 mutant	2	2	-0.223687	-0.518919	0.632835
TCGA-T1-A6J8-01A-11R-A32O-07	Grp1	-0.491656	Hepatocellular Carcinoma	HCC	MALE	68	WHITE			G1/G2	Macro/Micro	T1		0	0	0.0630137	0	0.0630137	-3.25811	-0.775311			p53 mut	-0.469636	WT	L3	L3	0.116173	0.268431	0.0243633
TCGA-UB-A7MA-01A-11R-A33R-07	Grp2	0.450357	Hepatocholangiocarcinoma (Mixed)	CCA_Like	FEMALE	62	WHITE	No	Stage II	G1/G2	Macro/Micro	T2	HBV.neg	0	1	0.605479	0	2.32329	1.40802	0.323561	42	HRD High	WT	0.1232	p53 mutant	2	2	-0.443	-0.921224	0.242019
TCGA-UB-A7MB-01A-11R-A33R-07	Grp2	0.616698	Hepatocellular Carcinoma	HCC	MALE	24	WHITE	No	Stage II	G3/G4	None	T2	HBV.neg	0	1	0.131507	0	1.64658	1.22013	-0.286208	29	HRD High	p53 mut	0.648897	p53 mutant	2	2	0.196504	0.0713149	0.109631
TCGA-UB-A7MC-01A-11R-A33R-07	Grp2	0.405512	Hepatocellular Carcinoma	HCC	MALE	59	WHITE	Cirrhosis/Fibrosis	Stage III/IV	G3/G4	None	T3/T4	HBV.pos	17.3841	1	0.983562	0	1.36986	0.610476	-0.886855	20	HRD High	p53 mut	0.383798	p53 mutant	2	2	-0.198774	-0.709559	0.112102
TCGA-UB-A7MD-01A-12R-A352-07	Grp1	-0.20001	Hepatocellular Carcinoma	HCC	MALE	67	BLACK	Cirrhosis/Fibrosis	Stage I	G3/G4	None	T1	HBV.neg	0	0	0.142466	1	0.142466	-0.0484437	-0.114474	9	HRD Low	p53 mut	-0.139318	WT	L3	L3	0.110072	0.0458611	0.0654836
TCGA-UB-A7ME-01A-11R-A33J-07	Grp2	0.182129	Hepatocellular Carcinoma	HCC	MALE	51	ASIAN	Cirrhosis/Fibrosis	Stage I	G1/G2	None	T1	HBV.pos	13.4007	0	1.33151	0	1.33151	0.565605	-0.172957	36	HRD High	WT	0.0687073	p53 mutant	2	2	-0.23483	-0.303323	0.129186
TCGA-UB-A7MF-01A-11R-A33J-07	Grp2	0.515133	Hepatocellular Carcinoma	HCC	MALE	56	WHITE	Cirrhosis/Fibrosis	Stage III/IV	G1/G2	None	T3/T4	HBV.neg	0	1	0.364384	1	0.586301	1.10947	0.384768	29	HRD High	p53 mut	0.398857	p53 mutant	2	2	0.13231	0.129528	0.229748
TCGA-UB-AA0U-01A-11R-A38B-07	Grp2	0.382546	Hepatocellular Carcinoma	HCC	MALE	60	WHITE	No	Stage II	G1/G2	Macro/Micro	T2	HBV.neg	0	1	0.290411	0	0.89589	0.309501	0.522282	41	HRD High	WT	0.226847	p53 mutant	2	2	-0.0881461	0.0539655	-0.0333444
TCGA-UB-AA0V-01A-11R-A38B-07	Grp1	-0.152546	Hepatocellular Carcinoma	HCC	FEMALE	69	WHITE	No	Stage I	G1/G2	None		HBV.neg	0	0	0.860274	0	0.860274	-2.74141	0.192559	0	HRD Low	WT	-0.717112	WT	L1	L1+L2	0.173456	0.292615	-0.25733
TCGA-WJ-A86L-01A-12R-A39D-07	Grp1	0.0177134	Hepatocellular Carcinoma	HCC	FEMALE	68	WHITE	No	Stage I	G1/G2	None	T1	HBV.neg	0	0	0.945205	0	0.945205	0.188601	-0.208143	23	HRD High	p53 mut	0.245189	p53 mutant	L3	L3	-0.214417	-0.415207	-0.569229
TCGA-WQ-A9G7-01A-11R-A37K-07	Grp2	0.126042	Hepatocellular Carcinoma	CCA_Like	FEMALE	71	WHITE			G3/G4	None	T3/T4	HBV.neg	0	0	0.0821918	0	0.0821918	1.63254	0.808774	34	HRD High	p53 mut	0.633134	p53 mutant	2	2	-0.301532	-0.648044	0.0789993
TCGA-WQ-AB4B-01A-11R-A41C-07	Grp1	-0.180698	Hepatocellular Carcinoma	HCC	MALE	62	WHITE		Stage II	G1/G2	None	T2	HBV.pos	2.80735	1	0.747945	0	1.08219	-0.424312	0.475918	9	HRD Low	p53 mut	-0.0567395	WT	L2	L1+L2	-0.00844798	0.182936	0.0195533
TCGA-WX-AA44-01A-11R-A39D-07	Grp2	0.164118	Hepatocellular Carcinoma	CCA_Like	FEMALE	64	WHITE	Cirrhosis/Fibrosis	Stage I	G3/G4	None	T1	HBV.neg	0	1	0.673973	0	1.68493	0.478464	0.776867	15	HRD Low	p53 mut	0.403935	p53 mutant	2	2	-0.306174	-0.3934	-0.158074
TCGA-WX-AA46-01A-11R-A39D-07	Grp1	-0.331326	Hepatocellular Carcinoma	HCC	MALE	61	WHITE	No	Stage II	G1/G2	None	T2	HBV.neg	0	0	2.07123	0	2.07123	-3.19994	-0.766052	5	HRD Low	WT	-0.70364	WT	L1	L1+L2	0.313958	0.415913	-0.0664517
TCGA-WX-AA47-01A-11R-A39D-07	Grp1	-0.463902	Hepatocellular Carcinoma	HCC	FEMALE	33	WHITE	No	Stage III/IV	G1/G2	None	T3/T4	HBV.neg	0	1	0.282192	1	1.52329	-0.547493	0.125702	6	HRD Low	WT	0.123312	p53 mutant	L2	L1+L2	-0.0244671	-0.36498	0.129985
TCGA-XR-A8TC-01A-11R-A36F-07	Grp2	0.164108	Hepatocellular Carcinoma	HCC	FEMALE	43	WHITE	Cirrhosis/Fibrosis	Stage I	G1/G2	None	T1	HBV.pos	2.80735	0	3.66849	0	3.66849	-0.246114	-0.213953			WT	0.12958	p53 mutant	2	2	-5.48013e-05	-0.00687693	-0.0536157
TCGA-XR-A8TD-01A-12R-A39D-07	Grp2	0.362661	Hepatocellular Carcinoma	HCC	FEMALE	49	WHITE	No	Stage III/IV	G3/G4	None	T3/T4	HBV.neg	0	0	2.82192	0	2.82192	1.26681	0.439447	29	HRD High	WT	0.376228	p53 mutant	2	2	0.25893	0.128943	-0.013559
TCGA-XR-A8TE-01A-11R-A36F-07	Grp1	-0.4294	Hepatocellular Carcinoma	HCC	MALE	16	WHITE	No	Stage III/IV	G1/G2	None	T3/T4	HBV.neg	0	1	0.575342	0	2.53425	-2.37469	-1.19169	4	HRD Low	WT	-0.584888	WT	L1	L1+L2	-0.1863	-0.635892	0.072486
TCGA-XR-A8TF-01A-11R-A36F-07	Grp1	-0.292616	Hepatocellular Carcinoma	HCC	MALE	74	WHITE	Cirrhosis/Fibrosis	Stage I	G1/G2	None	T1	HBV.neg	0	1	0.632877	1	1.89863	-0.502493	-0.660586	14	HRD Low	WT	-0.0352821	WT	L3	L3	0.0108571	-0.309628	0.196773
TCGA-XR-A8TG-01A-11R-A36F-07	Grp2	0.336269	Hepatocellular Carcinoma	HCC	MALE	58	WHITE	Cirrhosis/Fibrosis	Stage I	G1/G2		T1	HBV.neg	0	1	0.958904	0	2.46027	0.709428	0.0698686	20	HRD High	p53 mut	0.476028	p53 mutant	2	2	-0.264483	-0.230565	-0.081054
TCGA-YA-A8S7-01A-11R-A37K-07	Grp2	0.288199	Hepatocellular Carcinoma	Blast_Like	MALE	68	WHITE		Stage III/IV	G3/G4		T3/T4	HBV.neg	0	1	1.09041	1	1.12877	1.09756	0.258268	19	HRD Low	p53 mut	0.525227	p53 mutant	2	2	-0.22328	-0.665406	0.187296
TCGA-ZP-A9CV-01A-11R-A38B-07	Grp1	-0.30218	Hepatocellular Carcinoma	HCC	MALE	59	WHITE			G1/G2	None	T1	HBV.neg	0	1	2.98082	1	2.98082	-1.14615	-0.312284	5	HRD Low	WT	-0.578794	WT	L1	L1+L2	0.0995711	0.301805	-0.270263
TCGA-ZP-A9CY-01A-11R-A38B-07	Grp1	-0.350629	Hepatocellular Carcinoma	HCC	FEMALE	66	WHITE	Cirrhosis/Fibrosis		G1/G2		T1	HBV.neg	0	0	2.14247	0	2.14247	-1.58673	-0.834153	6	HRD Low	WT	-0.710522	WT	L3	L3	0.149903	0.476971	-0.243629
TCGA-ZP-A9CZ-01A-11R-A38B-07	Grp2	0.484918	Hepatocellular Carcinoma	HCC	MALE	72	ASIAN	Cirrhosis/Fibrosis		G1/G2	Macro/Micro	T1	HBV.neg	0	0	1.93425	0	1.93425	0.804248	-0.268729	30	HRD High	WT	0.571492	p53 mutant	2	2	-0.101306	-0.189674	0.105296
TCGA-ZP-A9D0-01A-11R-A37K-07	Grp1	-0.466579	Hepatocellular Carcinoma	HCC	FEMALE	67	BLACK	No		G1/G2		T1	HBV.neg	0	0	2.98904	0	2.98904	-2.07473	-0.806312	23	HRD High	WT	-0.38429	WT	L1	L1+L2	0.301107	0.321609	-0.130221
TCGA-ZP-A9D1-01A-11R-A38B-07	Grp1	-0.125605	Hepatocellular Carcinoma	HCC	FEMALE	56	WHITE	Cirrhosis/Fibrosis		G1/G2		T1	HBV.neg	0	0	0.0575342	0	0.0575342	-2.07408	-0.102071	14	HRD Low	WT	-0.657203	WT	L1	L1+L2	0.0165823	-0.100124	-0.0900105
TCGA-ZP-A9D2-01A-11R-A38B-07	Grp2	0.339325	Hepatocellular Carcinoma	CCA_Like	MALE	51	WHITE	Cirrhosis/Fibrosis		G1/G2		T2	HBV.neg	0	1	0.863014	1	2.09589	0.220987	-0.109094	12	HRD Low	p53 mut	0.02084	p53 mutant	2	2	-0.351151	-0.868389	-0.126958
TCGA-ZP-A9D4-01A-11R-A37K-07	Grp1	-0.161711	Hepatocellular Carcinoma	HCC	FEMALE	64	WHITE	No		G1/G2	None	T1	HBV.neg	0	0	1.08219	0	1.08219	-0.589052	-0.445471	8	HRD Low	WT	-0.4033	WT	L1	L1+L2	-0.0165261	-0.142182	-0.234121
TCGA-ZS-A9CD-01A-11R-A37K-07	Grp1	-0.648839	Hepatocellular Carcinoma	HCC	MALE	73	WHITE	Cirrhosis/Fibrosis	Stage II	G1/G2	None	T2	HBV.neg	0	1	1.01644	1	3.79726	-1.83863	-0.250927	6	HRD Low	WT	-0.545024	WT	L1	L1+L2	0.248499	0.279853	-0.0430097
TCGA-ZS-A9CE-01A-11R-A37K-07	Grp1	-0.234311	Hepatocellular Carcinoma	HCC	FEMALE	79	WHITE	No	Stage II	G1/G2	Macro/Micro	T2	HBV.neg	0	0	3.4	0	3.4	-0.128058	0.0209334	17	HRD Low	WT	-0.27353	WT	L3	L3	0.249908	0.59074	-0.113793
TCGA-ZS-A9CF-01A-11R-A38B-07	Grp2	0.441686	Hepatocellular Carcinoma	HCC	MALE	64	WHITE	No	Stage II	G1/G2	Macro/Micro	T2	HBV.neg	0	1	1.74247	0	5	1.27207	0.0349086	38	HRD High	WT	0.242679	p53 mutant	2	2	-0.0174915	0.0810335	-0.285013
TCGA-ZS-A9CF-02A-11R-A38B-07	Grp2	0.565963	Hepatocellular Carcinoma	HCC	MALE	64	WHITE	No	Stage II	G1/G2	Macro/Micro	T2	HBV.neg	0	1	1.74247	0	5	1.44517	-0.795354	38	HRD High	WT	0.308091	p53 mutant	2	2	-0.119604	-0.41076	-0.0951609
TCGA-ZS-A9CG-01A-11R-A37K-07	Grp1	-0.442184	Hepatocellular Carcinoma	HCC	MALE	55	WHITE	No	Stage II	G1/G2	Macro/Micro	T2	HBV.neg	0	0	0.934247	0	0.934247	-3.76235	0.0787506	6	HRD Low	WT	-0.610252	WT	L1	L1+L2	0.492284	0.409441	-0.165035
